# Supplementary material for: Genome-Wide Identification of Essential and Auxiliary Gene Sets for Magnetosome Biosynthesis in Magnetospirillum gryphiswaldense
Source: PubMed Central journal article supplement (PMC7676999; doi:10.1128/msystems.00565-20), 2020-11-17
Supplement: mSystems.00565-20-sf003.pdf [file mSystems.00565-20-sf003.pdf]

MGMSRv2\_\_3373-3377 (3378)

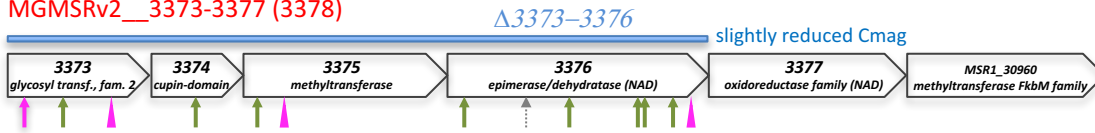

putative cell wall biogenesis/  
modification

MGMSRv2\_\_4001-4006

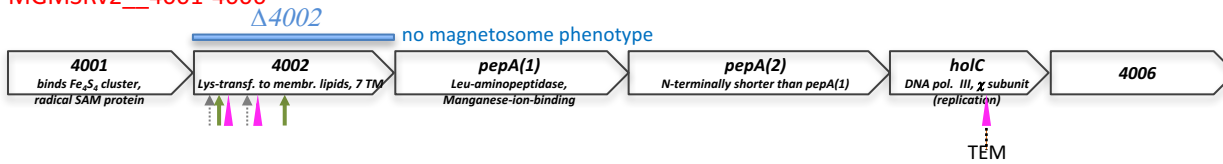

putative cell wall modification

cMGMSRv2\_\_0149-0152

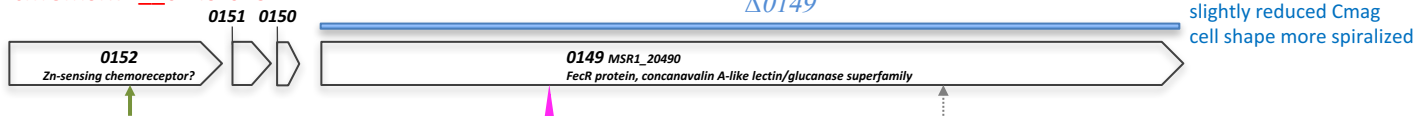

?
