# Supplementary material for: Genome-Wide Identification of Essential and Auxiliary Gene Sets for Magnetosome Biosynthesis in Magnetospirillum gryphiswaldense
Source: PubMed Central journal article supplement (PMC7676999; doi:10.1128/msystems.00565-20), 2020-11-17

- ↓ 1 unique Tn-hit
- ..... genome average: 1.995 hits/gene locus
- ..... MAI average: 7.38 hits/gene locus
- █ Nmag fraction of characterized
- ▨ Wmag fraction of characterized
- ▭ wtmag fraction of characterized
- ↓ 1 unique Tn-hit/kb of gene

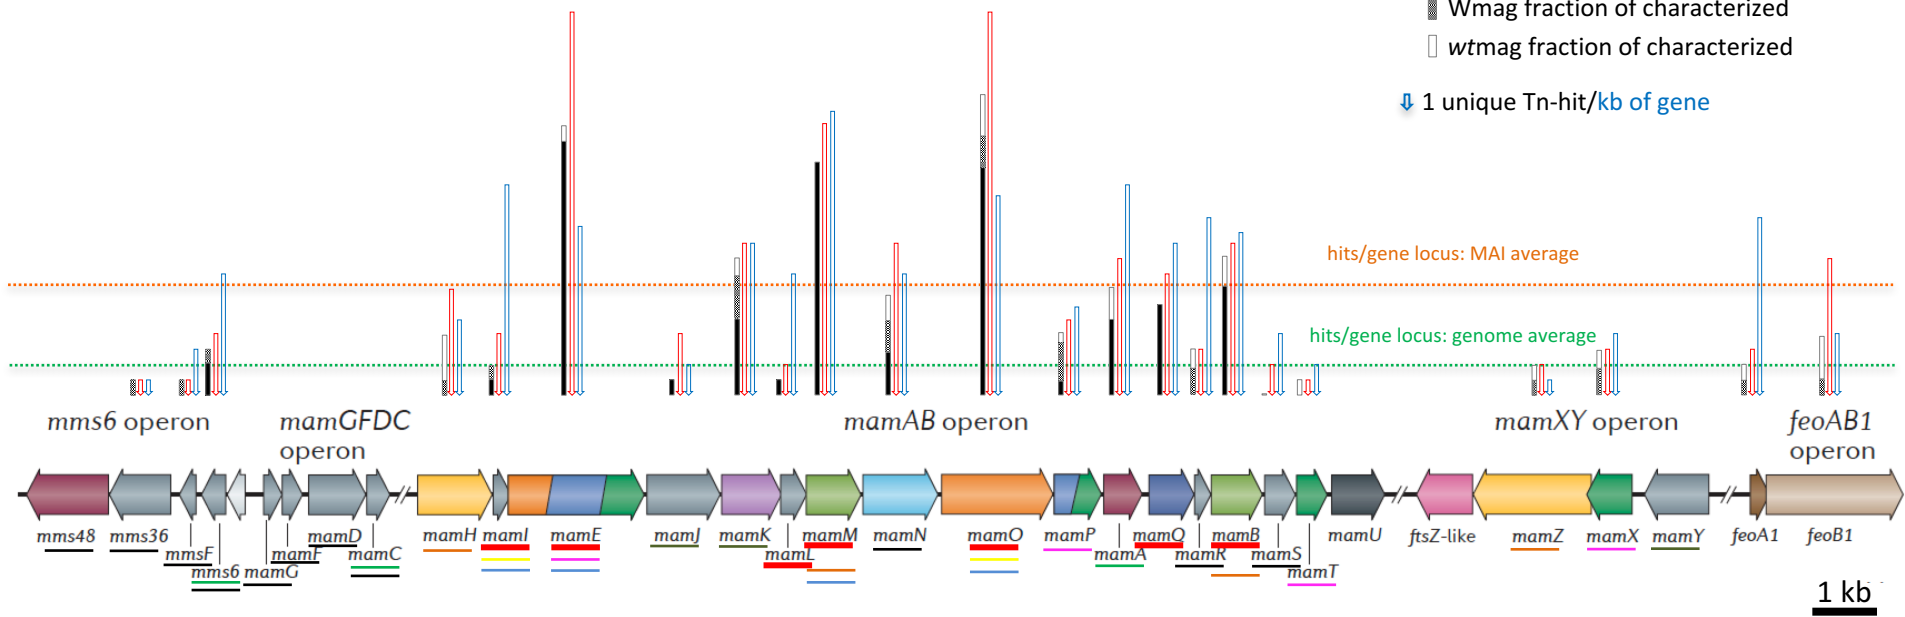

Supplement: mSystems.00565-20-sf004.pdf [file mSystems.00565-20-sf004.pdf]
