# Supplementary material for: Genome-Wide Identification of Essential and Auxiliary Gene Sets for Magnetosome Biosynthesis in Magnetospirillum gryphiswaldense
Source: PubMed Central journal article supplement (PMC7676999; doi:10.1128/msystems.00565-20), 2020-11-17

**A**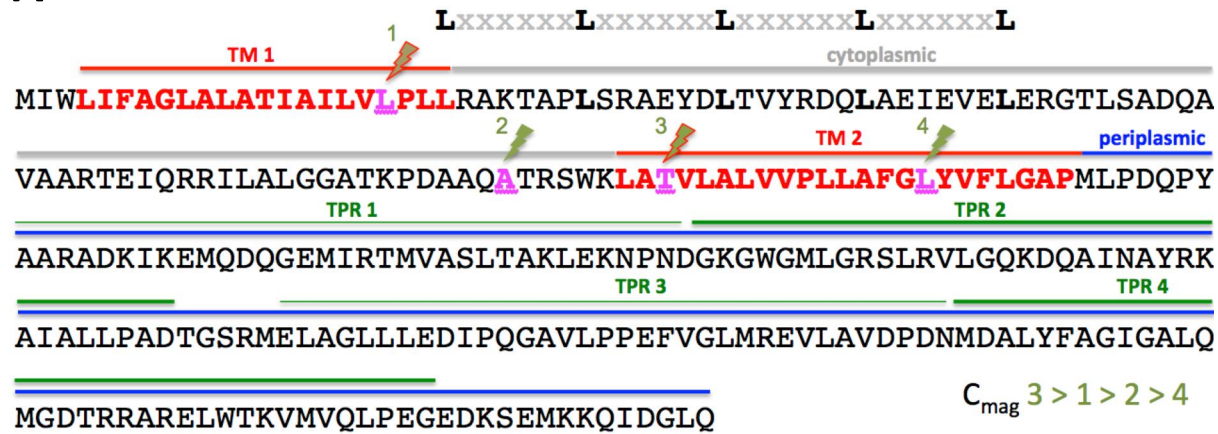**B**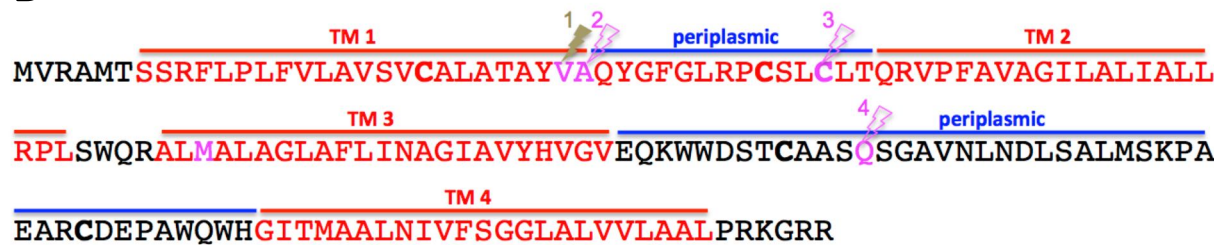**C**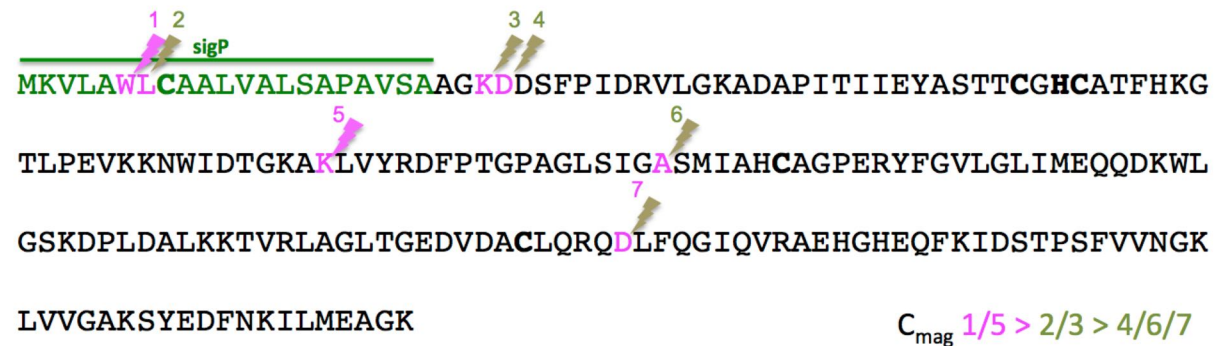

Supplement: mSystems.00565-20-sf005.pdf [file mSystems.00565-20-sf005.pdf]
