# Supplementary material for: Genome-Wide Identification of Essential and Auxiliary Gene Sets for Magnetosome Biosynthesis in Magnetospirillum gryphiswaldense
Source: PubMed Central journal article supplement (PMC7676999; doi:10.1128/msystems.00565-20), 2020-11-17
Supplement: mSystems.00565-20-st001.pdf [file mSystems.00565-20-st001.pdf]

**Table S1 A.** Bacterial strains and plasmids used in this study.

| Bacterial strains / plasmids | Relevant characteristics                                                                                                                                                                                                                             | Reference                                                  |
|------------------------------|------------------------------------------------------------------------------------------------------------------------------------------------------------------------------------------------------------------------------------------------------|------------------------------------------------------------|
| <b>Strains</b>               |                                                                                                                                                                                                                                                      |                                                            |
| <i>M. gryphiswaldense</i>    |                                                                                                                                                                                                                                                      |                                                            |
| WT                           |                                                                                                                                                                                                                                                      | D. Schüler and M. Köhler, Zentralblatt Mikrobiol 147, 1992 |
| <i>E. coli</i>               |                                                                                                                                                                                                                                                      |                                                            |
| DH5 $\alpha$                 | F <sup>-</sup> <i>supE44</i> $\Delta$ <i>lacU169</i> ( $\Phi$ 80<br><i>lacZDM15</i> ) <i>hsdR17</i> <i>recA1</i> <i>endA1</i><br><i>gyrA96</i> <i>thi-1</i> <i>relA1</i>                                                                             | Invitrogen                                                 |
| WM3064                       | donor strain for conjugation, <i>dap</i><br>auxotroph ( <i>thrB1004</i> <i>pro</i> <i>thi</i> <i>rpsL</i><br><i>hsdS</i> <i>lacZ</i> $\Delta$ M15 RP4-1360<br>$\Delta$ ( <i>araBAD</i> )567<br>$\Delta$ <i>dapA1341</i> ::[ <i>erm</i> <i>pir</i> ]) | W. Metcalf (unpublished)                                   |
| <b>Plasmids</b>              |                                                                                                                                                                                                                                                      |                                                            |
| pBAM1 (original)             |                                                                                                                                                                                                                                                      | E. Martínez-García <i>et al.</i> , BMC Microbiol 11, 2011  |
| GeneArt <sup>®</sup> plasmid | synthetic transposase ( $P_{mamDC45}$ )                                                                                                                                                                                                              | This study                                                 |
| pBAMOpt                      | synthetic transposase ( $P_{mamDC}$ )                                                                                                                                                                                                                | This study                                                 |

**Table S1 B.** Primers used in this study.

| Name      | Sequence (5'-3')                    |
|-----------|-------------------------------------|
| IB056     | ATGGAACCTGGCAGATCAGAAGT             |
| IB057     | TCAAAGAACAATCCAGAACTCTTGG           |
| IB058     | ATGAGGAAGAGCGGTTGCGC                |
| IB059     | TCATCCTGCGAGAACGGCGA                |
| IB060     | ATGATTGAAATTGGCGAGACCA              |
| IB061     | CTCAATGAGACCTTCTACATCGACTG          |
| IB062     | ATGGCAGTAAGCGATGCGG                 |
| IB063     | TCACTGCACGGTCATCCACA                |
| IB064     | ATGGGTACGCCAGGGGG                   |
| IB065     | TTATTTCGGAACCAGTATGGAAAGC           |
| IB140     | ATGGAACCTGGCAGATCAGA                |
| IB141     | CCACATCACCATTGAACATG                |
| ARB6      | GGCACGCGTCGACTAGTACNNNNNNNNNNNACGCC |
| ARB2      | GGCACGCGTCGACTAGTAC                 |
| Me-O-extF | CGGTTTACAAGCATAACTAGTGCGGC          |
| Me-O-intF | AGAGGATCCCCGGGTACCGAGCTCG           |
| Me-I-extR | CTCGTTTCACGCTGAATATGGCTC            |
| Me-I-intR | CAGTTTTATTGTTTCATGATGATATA          |
