# Supplementary material for: Genome-Wide Identification of Essential and Auxiliary Gene Sets for Magnetosome Biosynthesis in Magnetospirillum gryphiswaldense
Source: PubMed Central journal article supplement (PMC7676999; doi:10.1128/msystems.00565-20), 2020-11-17
Supplement: mSystems.00565-20-st002.pdf [file mSystems.00565-20-st002.pdf]

**Table S2.A. Tn5 insertion clones selected as Nmag/Wmag during visual screening of the mutagenesis library, and characterized in detail.**

| exMAI              | Locus-tag MSR1(L), GenBank acc. CP027526, CP027527 (R. Uebe <i>et al</i> , Genome Announc 6, 2018) | Insertion position MSR1(L) | Locus-tag MGMSRv2, GenBank acc. HG794546 (X. Wang <i>et al</i> , Genome Announc 2, 2014) | Insertion Position in MGMSRv2 | inMAI = n, exMAI = y             | (putative) functional category                                              | Annotation                                                                                                                                  | Growth | Magnetic response | Growth2 | Magnetic response2 | Comments                                                  |
|--------------------|----------------------------------------------------------------------------------------------------|----------------------------|------------------------------------------------------------------------------------------|-------------------------------|----------------------------------|-----------------------------------------------------------------------------|---------------------------------------------------------------------------------------------------------------------------------------------|--------|-------------------|---------|--------------------|-----------------------------------------------------------|
| exMAI non-magnetic | MSR1L_12470                                                                                        | 1.235.408                  | MGMSRv2_1015                                                                             | 1.061.482                     | n                                | peptide hydrolysis                                                          | conserved protein of unknown function, peptidase S1 family                                                                                  | 0,086  | 0                 | ++      | -                  |                                                           |
|                    | MSR1L_11940                                                                                        | 1.182.493                  | MGMSRv2_1068                                                                             | 1.114.215                     | n                                | nitrogen metabolism                                                         | putative glutamate synthase [NADPH] small chain                                                                                             | 0,07   | 0                 | ++      | -                  |                                                           |
|                    | MSR1L_10000                                                                                        | 989.365                    | MGMSRv2_1257                                                                             | ?                             | n                                | fatty acid biosynthesis                                                     | fatty acid biosynthesis gene (beta-ketoacyl-synthase, N-terminal domain), part of a large cluster of putative fatty acid biosynthesis genes | 0,14   | 0                 | +++     | -                  |                                                           |
|                    | MSR1L_02290                                                                                        | 232.226                    | MGMSRv2_2009                                                                             | 2.115.735                     | n                                | signaling, MCP                                                              | methyl-accepting chemotaxis receptor/sensory transducer                                                                                     | 0,21   | 0                 | +++     | -                  |                                                           |
|                    | MSR1L_01960                                                                                        | 191.436                    | MGMSRv2_2042                                                                             | 2.156.058                     | n                                | membrane transport?                                                         | uncharacterized membrane protein with 2 EamA domains                                                                                        | 0,196  | 0                 |         | -                  |                                                           |
|                    | MSR1L_32750                                                                                        | 3.463.440                  | MGMSRv2_3565                                                                             | 3.646.533                     | n                                | nucleotide-hydrolysis?                                                      | putative HAD-superfamily hydrolase (phosphohydrolase)                                                                                       | 0,11   | 0                 | +++     | -                  |                                                           |
|                    | MSR1L_27630                                                                                        | 2.940.618                  | MGMSRv2_3633                                                                             | 3.718.703                     | n                                | signaling                                                                   | GGDEF domain-containing protein                                                                                                             | 0,13   | 0                 | +++     | -                  |                                                           |
|                    | MSR1L_27640                                                                                        | 2.941.097                  | MGMSRv2_3634                                                                             | 3.719.855                     | n                                | central metabolism                                                          | NAD(P)-dependent malic enzyme                                                                                                               | 0,077  | 0                 | ++      | -                  |                                                           |
|                    | MSR1L_23600                                                                                        | 2.526.558                  | MGMSRv2_4041                                                                             | 4.134.803                     | n                                | PHB biosynthesis                                                            | poly-beta-hydroxybutyrate polymerase PhbC                                                                                                   | 0,132  | 0                 | ++      | -                  |                                                           |
| MSR1L_38790        | 4.044.656                                                                                          | MGMSRv2_4153               | 4.251.079                                                                                | n                             | extracytoplasmic solute receptor | putative TRAP-type uncharacterized transporter solute receptor, TAXI family | 0,091                                                                                                                                       | 0      | ++                | -       |                    |                                                           |
|                    | MSR1L_20490_corr                                                                                   | 2.154.630                  | MGMSRv2_0149                                                                             | 170.891                       | n                                | iron sensor?                                                                | Laminin G-domain containing FecR-protein, Ca-binding metalloprotease                                                                        | 0,105  | 0,29              | ++      | +                  | huge protein (31 kDa); periplasmic iron dicitrate sensor? |
|                    | MSR1L_18220                                                                                        | 1.921.916                  | MGMSRv2_0391                                                                             | 419.789                       | n                                | signaling, MCP                                                              | methyl-accepting chemotaxis receptor                                                                                                        | 0,11   | 0,47              | ++      | +                  |                                                           |
|                    | MSR1L_06710                                                                                        | 669.779                    | MGMSRv2_0611                                                                             | 659.012                       | n                                | nitrogen metabolism                                                         | putative asparagine synthetase (glutamine-hydrolyzing)                                                                                      | 0,121  | 0,36              | ++      | +                  |                                                           |
|                    | MSR1L_14910                                                                                        | 1.507.490                  | MGMSRv2_1555                                                                             | 1.600.378                     | n                                | redox process                                                               | electron transfer flavoprotein (alpha subunit)                                                                                              | 0,11   | 0,3               | +++     | +                  |                                                           |
|                    | MSR1L_15190                                                                                        | 1.540.079                  | MGMSRv2_1585                                                                             | 1.636.230                     | n                                | membrane transport?                                                         | membrane protein (DUF 2339)                                                                                                                 | 0,166  | 0,4               | ++      | +                  | large protein with 26 transmembrane domains               |
|                    | MSR1L_05990                                                                                        | 592.468                    | MGMSRv2_1716                                                                             | 1.813.723                     | n                                | anaerobic respiration                                                       | nitric oxide reductase (cyt c) subunit B (NorB)                                                                                             | 0,024  | 0,3               | +       | +                  |                                                           |
|                    | MSR1L_05990                                                                                        | 592.296                    | MGMSRv2_1716                                                                             | 1.813.903                     | n                                | anaerobic respiration                                                       | nitric oxide reductase (cyt c) subunit B (NorB)                                                                                             | 0,14   | 0,07              | +       | +                  |                                                           |
|                    | MSR1L_05930                                                                                        | 586.731                    | MGMSRv2_1722                                                                             | 1.818.698                     | n                                | iron sensor?                                                                | Cadherin-like domain containing FecR-proten, Ca-binding metalloprotease                                                                     | 0,072  | 0,38              | ++      | +                  |                                                           |
|                    | MSR1L_20710                                                                                        | 2.203.220                  | MGMSRv2_2075                                                                             | 2.190.040                     | n                                | protein-protein interaction                                                 | TPR-domain containing protein                                                                                                               | 0,1    | 0,58              | +++     | +                  |                                                           |
|                    | MSR1L_22700                                                                                        | ?                          | MGMSRv2_2273                                                                             | 2.403.749                     | n                                | periplasmatic oxidative protein folding                                     | thiol:disulfide interchange protein, DsbA-like                                                                                              | 0,155  | 0,1               | ++      | +                  |                                                           |
|                    | MSR1L_22700                                                                                        | ?                          | MGMSRv2_2273                                                                             | 2.403.925                     | n                                | periplasmatic oxidative protein folding                                     | thiol:disulfide interchange protein, DsbA-like                                                                                              | 0,204  | 0,1               | +++     | +                  |                                                           |

|                         |           |                           |           |   |                                              |                                                                                                                    |       |      |     |    |                                                                                                                    |
|-------------------------|-----------|---------------------------|-----------|---|----------------------------------------------|--------------------------------------------------------------------------------------------------------------------|-------|------|-----|----|--------------------------------------------------------------------------------------------------------------------|
| MSR1L_22700             | ?         | MGMSRV2_2273              | 2.404.129 | n | <b>periplasmic oxidative protein folding</b> | thiol:disulfide interchange protein, DsbA-like                                                                     | 0,076 | 0,24 | ++  | +  |                                                                                                                    |
| MSR1L_38410             | 4.012.732 | MGMSRV2_2474              | 2.585.698 | n | <b>DNA repair</b>                            | DNA mismatch repair protein MutL                                                                                   | 0,18  | 0,78 | +++ | +  |                                                                                                                    |
| MSR1L_27560             | 2.931.775 | MGMSRV2_3625              | 3.709.861 | n | <b>flagellar biosynthesis</b>                | flagellar biosynthesis protein FlhA                                                                                | 0,22  | 0,22 | +++ | +  |                                                                                                                    |
| MSR1L_25430             | 2.703.940 | MGMSRV2_3871              | 3.964.826 | n | <b>oligopeptide transport?</b>               | putative oligopeptide transporter subunit, periplasmic-binding component of ABC superfamily transporter            | 0,106 | 0,36 | ++  | +  |                                                                                                                    |
| MSR1L_00450             | 50.460    | MGMSRV2_0031              | ?         | n | <b>signaling, histidine kinase</b>           | two-component sensor histidine kinase                                                                              | 0,16  | 0,8  | +++ | ++ |                                                                                                                    |
| MSR1L_01450             | 139.796   | MGMSRV2_0134              | 127.051   | n | ?                                            | uncharacterized protein                                                                                            | 0,15  | 1    | +++ | ++ | intergenic (upstream of gene)                                                                                      |
| MSR1L_20000             | 2.092.038 | MGMSRV2_0199              | 255.584   | n | <b>membrane transport</b>                    | inner-membrane translocator, LivM-like                                                                             | 0,15  | 0,67 | +++ | ++ |                                                                                                                    |
| MSR1L_19740             | 2.059.355 | MGMSRV2_0225              | 268.207   | n | ?                                            | probable intracellular septation protein A                                                                         | 0,125 | 0    | ++  | ++ | gene <i>ispZ</i> ; absence of protein can cause a cell division defect in an intracellularly replicating bacterium |
| MSR1L_19360             | 2.023.169 | MGMSRV2_0266              | 305.286   | n | ?                                            | Cadherin-like domain containing protein, Ca-binding metalloprotease                                                | 0,244 | 0,86 | +++ | ++ |                                                                                                                    |
| MSR1L_30250             | 3.200.894 | MGMSRV2_0365              | 399.091   | n | <b>solute transport</b>                      | ammonium transporter AmtB                                                                                          | 0,16  | 1,25 | +++ | ++ |                                                                                                                    |
| MSR1L_18150             | 1.909.781 | MGMSRV2_0398              | 429.605   | n | <b>nutrient mobilization</b>                 | exopolyphosphatase                                                                                                 | 0,12  | 1,44 | +++ | ++ |                                                                                                                    |
| MSR1L_17640             | 1.847.099 | MGMSRV2_0450              | 492.828   | n | <b>redox process</b>                         | FixG-like cytochrome c oxidase (iron-sulfur cluster-binding protein)                                               | 0,21  | 0,78 | +++ | ++ |                                                                                                                    |
| MSR1L_17440             | 1.829.717 | MGMSRV2_0469              | 509.958   | n | <b>sulfur metabolism</b>                     | phosphoadenylyl-sulfate reductase (thioredoxin) CysH                                                               | 0,081 | 1,05 | ++  | ++ |                                                                                                                    |
| MSR1L_17430             | 1.828.697 | MGMSRV2_0470              | 510.978   | n | <b>sulfur metabolism</b>                     | sulfate adenylyltransferase CysD                                                                                   | 0,13  | 0,41 | +++ | ++ |                                                                                                                    |
| MSR1L_17040             | 1.784.492 | MGMSRV2_0511              | 556.222   | n | <b>periplasmic oxidative protein folding</b> | putative disulfide bond formation protein DsbB                                                                     | 0,13  | 0,31 | +++ | ++ |                                                                                                                    |
| MSR1L_16850             | 1.763.821 | MGMSRV2_0532              | 577.258   | n | ?                                            | DJ155 domain-containing protein                                                                                    | 0,14  | 0,87 | +++ | ++ |                                                                                                                    |
| MSR1L_16320             | 1.705.544 | MGMSRV2_0732              | 767.537   | n | <b>signaling, histidine kinase</b>           | sensor histidine kinase with N-terminal methyltransferase/transferase domains                                      | 0,078 | 0,87 | ++  | ++ |                                                                                                                    |
| MSR1L_16160             | 1.686.013 | MGMSRV2_0749              | 785.805   | n | <b>transcription regulation</b>              | lambda repressor-like helix-turn-helix domain protein                                                              | 0,158 | 0,72 | ++  | ++ |                                                                                                                    |
| MSR1L_14090             | 1.409.995 | MGMSRV2_0853              | 897.589   | n | <b>glycan biosynthesis</b>                   | glycogen synthase GlgA                                                                                             | 0,16  | 1,15 | +++ | ++ |                                                                                                                    |
| MSR1L_13060/MSR1L_13070 | 1.298.733 | MGMSRV2_0953/MGMSRV2_0952 | 996.588   | n | <b>transcription regulation</b>              | transcriptional regulator, TetR family                                                                             | 0,13  | 1,36 | +++ | ++ | adjacent to <i>mipZ</i> , but divergently transcribed                                                              |
| MSR1L_11790             | 1.168.928 | MGMSRV2_1082              | 1.129.020 | n | <b>stringent response</b>                    | bifunctional (P)ppGpp synthetase II and guanosine-3',5'-bispyrophosphate 3'-pyrophosphohydrolase, RelA/SpoT family | 0,101 | 0,74 | ++  | ++ |                                                                                                                    |
| MSR1L_11550             | 1.142.149 | MGMSRV2_1113              | 1.157.041 | n | <b>signaling, histidine kinase</b>           | sensor histidine kinase                                                                                            | 0,088 | 0,49 | +++ | ++ |                                                                                                                    |
| MSR1L_11350             | 1.121.622 | MGMSRV2_1133              | 1.178.778 | n | ?                                            | beta-lactamase superfamily protein                                                                                 | 0,13  | 1,37 | +++ | ++ |                                                                                                                    |
| MSR1L_10260             | 1.014.414 | MGMSRV2_1231              | 1.277.279 | n | <b>signaling, phosphorelay</b>               | two component sensor histidine kinase/response regulator hybrid protein with phosphorelay domain                   | 0,11  | 0,88 | +++ | ++ |                                                                                                                    |
| MSR1L_10050             | 991.939   | MGMSRV2_1252              | 1.300.432 | n | ?                                            | putative AMP-dependent synthetase and ligase                                                                       | 0,13  | 1,29 | +++ | ++ |                                                                                                                    |

|             |           |              |           |   |                                         |                                                                        |       |      |     |    |                                                                               |
|-------------|-----------|--------------|-----------|---|-----------------------------------------|------------------------------------------------------------------------|-------|------|-----|----|-------------------------------------------------------------------------------|
| MSR1L_09800 | 968.014   | MGMSRv2_1279 | 1.325.408 | n | isoprenoid biosynthesis                 | geranyltranstransferase IspA                                           | 0,091 | 1    | ++  | ++ |                                                                               |
| MSR1L_09720 | 961.143   | MGMSRv2_1295 | 1.338.003 | n | redox process                           | NAD(FAD)-dependent disulfide oxidoreductase                            | 0,11  | 0,94 | +++ | ++ |                                                                               |
| MSR1L_08390 | 832.930   | MGMSRv2_1403 | 1.444.705 | n | anaerobic respiration                   | nitrite reductase NirS (cyt <i>cd1</i> )                               | 0,05  | 0,84 | ++  | ++ |                                                                               |
| MSR1L_08250 | 818.664   | MGMSRv2_1417 | 1.459.651 | n | outer membrane structure                | OmpA-like domain-containing protein                                    | 0,069 | 0,34 | ++  | ++ |                                                                               |
| MSR1L_15000 | 1.516.671 | MGMSRv2_1565 | 1.609.691 | n | solute transport?                       | uncharacterized membrane protein with 1 EamA domain                    | 0,11  | 1,72 | +++ | ++ |                                                                               |
| MSR1L_15530 | 1.578.098 | MGMSRv2_1617 | 1.669.557 | n | redox process                           | putative short chain acyl-CoA dehydrogenase                            | 0,13  | 1,11 | +++ | ++ |                                                                               |
| MSR1L_05880 | 580.065   | MGMSRv2_1726 | 1.826.130 | n | ?                                       | uncharacterized membrane protein                                       | 0,1   | 0,94 | +++ | ++ | intergenic region 3684/3683 (upstream of gene)                                |
| MSR1L_05370 | 529.524   | MGMSRv2_1777 | 1.876.671 | n | signaling, histidine kinase             | two-component sensor histidine kinase                                  | 0,11  | 0,82 | +++ | ++ |                                                                               |
| MSR1L_05070 | 495.250   | MGMSRv2_1810 | 1.910.567 | n | lactate utilization?                    | LUD-domain containing protein                                          | 0,05  | 0,97 | +   | ++ |                                                                               |
| MSR1L_26390 | 2.794.492 | MGMSRv2_1971 | 2.068.843 | n | ?                                       | uncharacterized protein                                                | 0,1   | 1,54 | +++ | ++ |                                                                               |
| MSR1L_02270 | 227.319   | MGMSRv2_2011 | 2.120.642 | n | ammonium assimilation                   | glutamate synthase [NADPH] large chain                                 | 0,14  | 0,87 | +++ | ++ |                                                                               |
| MSR1L_02170 | 211.717   | MGMSRv2_2021 | 2.136.272 | n | membrane transport, nitrogen metabolism | putative ABC transporter, urea, permease protein UrtE                  | 0,184 | 0,69 | +++ | ++ |                                                                               |
| MSR1L_21340 | 2.276.260 | MGMSRv2_2139 | 2.263.264 | n | cofactor biosynthesis                   | cobalamin biosynthesis protein, CobW/P47K family protein               | 0,08  | 1,06 | +++ | ++ |                                                                               |
| MSR1L_22700 | 2.419.586 | MGMSRv2_2273 | 2.404.131 | n | periplasmic oxidative protein folding   | thiol:disulfide interchange protein, DsbA-like                         | 0,075 | 0,63 | ++  | ++ |                                                                               |
| MSR1L_22700 | 2.419.644 | MGMSRv2_2273 | 2.404.182 | n | periplasmic oxidative protein folding   | thiol:disulfide interchange protein, DsbA-like                         | 0,055 | 0,98 | ++  | ++ |                                                                               |
| MSR1L_06440 | 640.122   | MGMSRv2_2461 | 2.576.127 | n | ?                                       | uncharacterized exported protein                                       | 0,2   | 1,41 | +++ | ++ |                                                                               |
| MSR1L_38310 | 4.006.480 | MGMSRv2_2484 | 2.591.828 | n | ?                                       | uncharacterized protein                                                | 0,17  | 0,43 | +++ | ++ | intergenic (upstream of gene); downstream of bacterio-hemerythrin             |
| MSR1L_37510 | 3.931.308 | MGMSRv2_2540 | 2.648.340 | n | ?                                       | bacteriophage capsid protein                                           | 0,135 | 0,8  | +++ | ++ | region encoding phage proteins!                                               |
| MSR1L_36930 | 3.876.892 | MGMSRv2_2673 | 2.772.479 | n | carbon metabolism                       | methylmalonyl-CoA mutase                                               | 0,09  | 1,25 | ++  | ++ |                                                                               |
| MSR1L_36480 | 3.835.835 | MGMSRv2_2712 | 2.811.816 | n | protein degradation                     | metalloprotease TldD/PmbA (zinc-dependent)                             | 0,12  | 1,3  | +++ | ++ | antibiotic maturation/secretion? CcdA (cyt c biogenesis protein) degradation? |
| MSR1L_36430 | ?         | MGMSRv2_2717 | 2.817.087 | n | iron sensor?                            | FecR-protein, Ca-binding metalloprotease                               | 0,148 | 0,88 | +++ | ++ |                                                                               |
| MSR1L_35320 | 3.707.072 | MGMSRv2_2825 | 2.934.877 | n | ?                                       | putative SAM-dependent methyltransferase                               | 0,1   | 0,42 | +++ | ++ |                                                                               |
| MSR1L_34190 | 3.604.410 | MGMSRv2_2950 | 3.045.740 | n | redox process, nitrogen metabolism      | nitrogen fixation protein FixG                                         | 0,155 | 0,92 | ++  | ++ |                                                                               |
| MSR1L_33940 | 3.583.056 | MGMSRv2_2976 | 3.068.552 | n | flagellum                               | flagellar biosynthesis protein FlIP                                    | 0,142 | 0,7  | +++ | ++ |                                                                               |
| MSR1L_33570 | 3.547.505 | MGMSRv2_3009 | 3.101.013 | n | ?                                       | exported protein with 2 DUF1566                                        | 0,101 | 0,79 | ++  | ++ |                                                                               |
| MSR1L_28800 | 3.052.140 | MGMSRv2_3151 | 3.229.708 | n | fatty acid metabolism                   | putative acyl-CoA carboxylase biotin-carrying subunit alpha chain AccC | 0,2   | 0,9  | +++ | ++ |                                                                               |
| MSR1L_29190 | 3.089.592 | MGMSRv2_3192 | 3.268.233 | n | redox process                           | cytochrome c -type biogenesis protein Ccml (CycH)                      | 0,08  | 0,96 | +++ | ++ |                                                                               |

|                         |           |                   |           |   |                                            |                                                                                                                             |       |      |     |     |                                                                                            |
|-------------------------|-----------|-------------------|-----------|---|--------------------------------------------|-----------------------------------------------------------------------------------------------------------------------------|-------|------|-----|-----|--------------------------------------------------------------------------------------------|
| MSR1L_29190             | 3.089.617 | MGMSRv2_3192      | 3.268.257 | n | redox process                              | cytochrome c-type biogenesis protein Ccml (CycH)                                                                            | 0,23  | 0,96 | +++ | ++  |                                                                                            |
| MSR1L_29190             | 3.089.338 | MGMSRv2_3192      | 3.268.033 | n | redox process                              | cytochrome c-type biogenesis protein Ccml (CycH)                                                                            | 0,12  | 1,16 | ++  | ++  |                                                                                            |
| MSR1L_29190             | ?         | MGMSRv2_3192      | 3.268.294 | n | redox process                              | cytochrome c-type biogenesis protein Ccml (CycH)                                                                            | 0,173 | 0,79 | +++ | ++  |                                                                                            |
| MSR1L_29810             | 3.161.209 | MGMSRv2_3255      | 3.337.096 | n | carbon metabolism                          | methylmalonyl-CoA mutase                                                                                                    | 0,09  | 0,9  | +++ | ++  |                                                                                            |
| MSR1L_30910             | 3.266.440 | MGMSRv2_3373      | 3.444.257 | n | cell wall formation                        | putative glycosyltransferase, family 2                                                                                      | 0,101 | 0,79 | ++  | ++  |                                                                                            |
| MSR1L_30910             | ?         | MGMSRv2_3373      | 3.444.827 | n | cell wall formation                        | putative glycosyltransferase, family 2                                                                                      | 0,112 | 0,7  | ++  | ++  |                                                                                            |
| MSR1L_30930             | 3.267.623 | MGMSRv2_3375      | 3.445.620 | n | ?                                          | exported protein, SAM-dependent methyltransferase                                                                           | 0,13  | 1    | ++  | ++  |                                                                                            |
| MSR1L_30940             | ?         | MGMSRv2_3376      | 3.447.717 | n | cell wall formation                        | putative NAD-dependent epimerase/dehydratase                                                                                | 0,19  | 0,77 | +++ | ++  |                                                                                            |
| MSR1L_32520             | 3.437.807 | MGMSRv2_3542      | 3.620.060 | n | cell wall formation                        | capsular polysaccharide biosynthesis protein CapD                                                                           | 0,11  | 0,51 | +++ | ++  |                                                                                            |
| MSR1L_32700             | 3.457.519 | MGMSRv2_3560      | 3.640.612 | n | methionine biosynthesis, sulfur metabolism | O-succinylhomoserine sulfhydrylase MetZ                                                                                     | 0,15  | 1,07 | +++ | ++  |                                                                                            |
| MSR1L_27180             | 2.889.518 | MGMSRv2_3585      | 3.666.512 | n | signaling, MCP                             | methyl-accepting chemotaxis receptor/sensory transducer                                                                     | 0,24  | 0,94 | +++ | ++  |                                                                                            |
| MSR1L_27780             | 2.957.189 | MGMSRv2_3648      | 3.735.057 | n | signaling, phosphorelay                    | Hpt domain-containing protein                                                                                               | 0,11  | 0,95 | +++ | ++  |                                                                                            |
| MSR1L_26700             | 2.832.812 | MGMSRv2_3736      | 3.826.289 | n | anaerobic cofactor biosynthesis            | putative sirohydrochlorin cobaltochelatease CbiX                                                                            | 0,113 | 1,11 | +++ | ++  |                                                                                            |
| MSR1L_24710             | 2.633.560 | MGMSRv2_3942      | 4.034.134 | n | redox process, fatty acid metabolism       | 3-hydroxyacyl-CoA dehydrogenase                                                                                             | 0,19  | 0,94 | +++ | ++  |                                                                                            |
| MSR1L_24490/MSR1L_24500 | 2.611.886 | MGMSRv2_3967/3966 | 4.056.678 | n | ?                                          | putative cytokinin riboside 5'-monophosphate phosphoribohydrolase (LOG family protein) / beta-lactamase superfamily protein | 0,13  | 1,12 | +++ | ++  | may affect 2 genes: hit in intergenic region (upstream of 2 divergently transcribed genes) |
| MSR1L_24400             | 2.605.496 | MGMSRv2_3976      | 4.063.068 | n | ?                                          | putative arsenite methyltransferase                                                                                         | 0,11  | 1,12 | +++ | ++  |                                                                                            |
| MSR1L_24330             | 2.600.607 | MGMSRv2_3985      | 4.069.370 | n | ?                                          | uncharacterized exported protein                                                                                            | 0,135 | 0,91 | ++  | ++  |                                                                                            |
| MSR1L_24180             | ?         | MGMSRv2_4002      | 4.089.224 | n | membrane lipid modification?               | conserved membrane protein of unknown function, phosphatidylglycerol lysyltransferase?                                      | 0,122 | 0,93 | ++  | ++  |                                                                                            |
| MSR1L_24180             | 2.581.355 | MGMSRv2_4002      | 4.089.325 | n | membrane lipid modification?               | conserved membrane protein of unknown function, phosphatidylglycerol lysyltransferase                                       | 0,077 | 0,6  | ++  | ++  |                                                                                            |
| MSR1L_24150             | ?         | MGMSRv2_4005      | 4.093.116 | n | DNA replication                            | DNA polymerase III subunit chi                                                                                              | 0,15  | 0,53 | +++ | ++  |                                                                                            |
| MSR1L_38770             | 4.042.345 | MGMSRv2_4151      | 4.247.156 | n | signaling                                  | conserved protien of unknown function-diguanylate cyclase (GGDEF and EAL domains)                                           | 0,086 | 0,7  | ++  | ++  |                                                                                            |
| MSR1L_39790             | 4.154.613 | MGMSRv2_4260      | 4.364.696 | n | ?                                          | conserved protein of unknown function (TPR repeat)                                                                          | 0,15  | 1,04 | +++ | ++  |                                                                                            |
| MSR1L_20470             | 2.151.586 | MGMSRv2_0152      | 175.870   | n | signaling, MCP                             | methyl-accepting chemotaxis receptor, zinc-binding                                                                          | 0,119 | 1,18 | ++  | +++ |                                                                                            |
| MSR1L_18630             | 1.950.998 | MGMSRv2_0352      | 388.660   | n | ?                                          | SIR2_2 domain-containing protein                                                                                            | 0,122 | 1,28 | +++ | +++ |                                                                                            |

|                   |           |                   |           |   |                                       |                                                                                                                     |       |      |     |     |                                                                              |
|-------------------|-----------|-------------------|-----------|---|---------------------------------------|---------------------------------------------------------------------------------------------------------------------|-------|------|-----|-----|------------------------------------------------------------------------------|
| MSR1L_18100       | 1.902.386 | MGMSRv2_0404      | 437.853   | n | signaling, MCP                        | methyl-accepting chemotaxis receptor with hemerythrin-like metal-binding domain                                     | 0,22  | 1,39 | +++ | +++ |                                                                              |
| MSR1L_18080       | 1.898.487 | MGMSRv2_0406      | 439.802   | n | fatty acid biosynthesis               | acetyl-CoA carboxylase, biotin carboxylase subunit                                                                  | 0,152 | 1,11 | ++  | +++ |                                                                              |
| MSR1L_17950       | 1.883.271 | MGMSRv2_0419      | 456.515   | n | transcription regulation              | putative transcriptional regulator, MarR-type                                                                       | 0,243 | 1,36 | +++ | +++ |                                                                              |
| MSR1L_17450       | 1.831.777 | MGMSRv2_0468      | 508.119   | n | sulfur metabolism                     | putative sulfite reductase                                                                                          | 0,15  | 1,57 | +++ | +++ |                                                                              |
| MSR1L_17440       | 1.829.666 | MGMSRv2_0469      | 509.963   | n | sulfate assimilation                  | phosphoadenylyl-sulfate reductase (thioredoxin) CysH                                                                | 0,1   | 1,73 | +++ | +++ |                                                                              |
| MSR1L_17430       | 1.828.762 | MGMSRv2_0470      | 510.913   | n | sulfate assimilation                  | sulfate adenylyltransferase CysD                                                                                    | 0,11  | 1,72 | +++ | +++ |                                                                              |
| MSR1L_17420       | 1.827.992 | MGMSRv2_0471      | 511.608   | n | sulfate assimilation                  | adenylylsulfate kinase CysC                                                                                         | 0,18  | 1,23 | +++ | +++ |                                                                              |
| MSR1L_17420       | 1.828.192 | MGMSRv2_0471      | 512.275   | n | sulfate assimilation                  | adenylylsulfate kinase CysC                                                                                         | 0,107 | 1,28 | +++ | +++ |                                                                              |
| MSR1L_16570       | 1.732.497 | MGMSRv2_0560      | 609.876   | n | transport                             | phosphate transport system permease protein PstA                                                                    | 0,071 | 0    | ++  | +++ |                                                                              |
| MSR1L_06670       | 664.301   | MGMSRv2_0607      | 653.093   | n | exo/lipopolysaccharide biosynthesis   | putative succinoglycan biosynthesis transport protein ExoP                                                          | 0,146 | 1,11 | +++ | +++ | intergenic region only in GenBank acc. CP027526, CP027527 (upstream of gene) |
| MSR1L_06690       | 667.630   | MGMSRv2_0609      | 655.028   | n | exo/lipopolysaccharide biosynthesis   | membrane protein, putative O-antigen polymerase                                                                     | 0,1   | 1,01 | +++ | +++ |                                                                              |
| MSR1L_12860       | 1.276.617 | MGMSRv2_0973      | 1.018.940 | n | lipid binding/transfer                | coenzyme Q-binding protein COQ10, START domain-containing protein                                                   | 0,135 | 1,46 | ++  | +++ |                                                                              |
| MSR1L_12410       | 1.226.809 | MGMSRv2_1021      | 1.069.130 | n | ?                                     | cyclic nucleotide-binding domain-containing protein                                                                 | 0,203 | 1,32 | +++ | +++ |                                                                              |
| MSR1L_11790       | 1.167.339 | MGMSRv2_1082      | 1.129.502 | n | stringent response                    | bifunctional (P)ppGpp synthetase II and guanosine-3',5'-bis pyrophosphate 3'-pyrophosphohydrolase, RelA/SpoT family | 0,17  | 1,62 | +++ | +++ |                                                                              |
| MSR1L_11470       | 1.142.149 | MGMSRv2_1121      | 1.168.412 | n | ?                                     | uncharacterized protein                                                                                             | 0,24  | 1,47 | +++ | +++ |                                                                              |
| MSR1L_10730       | ?         | MGMSRv2_1186      | 1.232.186 | n | type I protein secretion              | type 1 export protein                                                                                               | 0,163 | 1,23 | ++  | +++ |                                                                              |
| MSR1L_10730       | 1.059.011 | MGMSRv2_1186      | 1.232.549 | n | type I protein secretion              | type 1 export protein                                                                                               | 0,104 | 1,19 | ++  | +++ |                                                                              |
| MSR1L_10070       | 993.224   | MGMSRv2_1250      | 1.298.595 | n | cell wall formation                   | lipid A biosynthesis acyltransferase                                                                                | 0,164 | 1,45 | ++  | +++ |                                                                              |
| MSR1L_09470/09480 | 937.138   | MGMSRv2_1319/1320 | 1.362.228 | n | redox process, respiratory chain      | NADH-quinone oxidoreductase subunit I (Nuol)                                                                        | 0,14  | 1,15 | +++ | +++ | intergenic region 1319/1320 (upstream of gene 1319, nuol )                   |
| MSR1L_05750       | 569.512   | MGMSRv2_1739      | 1.837.060 | n | transport                             | ABC-transporter, ATP binding component                                                                              | 0,141 | 1,26 | ++  | +++ |                                                                              |
| MSR1L_06450       | 640.814   | MGMSRv2_1956      | 2.051.507 | n | ?                                     | uncharacterized protein with transmembrane domain                                                                   | 0,142 | 1,06 | +++ | +++ |                                                                              |
| MSR1L_26450       | 2.801.770 | MGMSRv2_1977      | 2.076.121 | n | transport                             | putative heme/hemopexin transporter protein HxuB                                                                    | 0,1   | 1,77 | +++ | +++ |                                                                              |
| MSR1L_02420       | 246.061   | MGMSRv2_1996      | 2.101.926 | n | ?                                     | alpha/beta hydrolase family protein                                                                                 | 0,14  | 1,28 | +++ | +++ |                                                                              |
| MSR1L_01820       | 177.578   | MGMSRv2_2056      | 2.170.297 | n | signaling, histidine kinase           | sensor histidine kinase with N-terminal sodium/solute symporter domain                                              | 0,137 | 1,39 | ++  | +++ |                                                                              |
| MSR1L_01720       | 166.193   | MGMSRv2_2066      | 2.180.906 | n | metal-binding                         | putative zinc- or iron-chelating domain containing protein                                                          | 0,123 | 1,19 | ++  | +++ |                                                                              |
| MSR1L_21760       | 2.318.242 | MGMSRv2_2179      | 2.304.151 | n | ?                                     | conserved protein of unknown function (TPR repeat and ferritin-like domain)                                         | 0,14  | 0,96 | +++ | +++ |                                                                              |
| MSR1L_22700       | 2.419.427 | MGMSRv2_2273      | 2.403.972 | n | periplasmic oxidative protein folding | thiol:disulfide interchange protein, DsbA-like                                                                      | 0,168 | 1,09 | +++ | +++ |                                                                              |

|             |           |              |           |   |                                       |                                                                 |       |      |     |     |  |
|-------------|-----------|--------------|-----------|---|---------------------------------------|-----------------------------------------------------------------|-------|------|-----|-----|--|
| MSR1L_22700 | 2.419.656 | MGMSRv2_2273 | 2.404.184 | n | periplasmic oxidative protein folding | thiol:disulfide interchange protein, DsbA-like                  | 0,249 | 1,34 | +++ | +++ |  |
| MSR1L_38000 | 3.973.131 | MGMSRv2_2515 | 2.624.981 | n | nitrogen metabolism                   | nitrogen-fixation sustaining protein CowN                       | 0,118 | 1,24 | ++  | +++ |  |
| MSR1L_36200 | 3.800.006 | MGMSRv2_2734 | 2.842.742 | n | oxygen defence?                       | redoxin/thioredoxin domain-containing exported protein          | 0,202 | 1,58 | +++ | +++ |  |
| MSR1L_35190 | ?         | MGMSRv2_2838 | 2.944.375 | n | signaling, histidine kinase           | two-component sensor histidine kinase                           | 0,2   | 1,51 | +++ | +++ |  |
| MSR1L_34740 | 3.657.073 | MGMSRv2_2882 | 2.983.125 | n | translation                           | methionyl-tRNA formyltransferase Fmt                            | 0,18  | 1,21 | +++ | +++ |  |
| MSR1L_34720 | 3.654.049 | MGMSRv2_2884 | 2.986.036 | n | signaling, MCP                        | methyl-accepting chemotaxis receptor                            | 0,227 | 1,28 | +++ | +++ |  |
| MSR1L_34000 | 3.587.815 | MGMSRv2_2970 | 3.063.271 | n | redox process, chaperone function     | heat shock protein Hsp33 family protein                         | 0,089 | 2,09 | ++  | +++ |  |
| MSR1L_33770 | 3.567.287 | MGMSRv2_2993 | 3.084.607 | n | ?                                     | uncharacterized protein with transmembrane domains              | 0,365 | 1,35 | +++ | +++ |  |
| MSR1L_33430 | 3.534.455 | MGMSRv2_3048 | ?         | n | DNA restriction                       | type I site-specific restriction-modification system, R subunit | 0,15  | 1,16 | +++ | +++ |  |
| MSR1L_29370 | ?         | MGMSRv2_3209 | 3.285.975 | n | DNA repair                            | DNA mismatch repair protein Muts                                | 0,233 | 1,44 | +++ | +++ |  |
| MSR1L_30580 | ?         | MGMSRv2_3332 | 3.406.750 | n | ?                                     | uncharacterized protein                                         | 0,163 | 1,46 | ++  | +++ |  |
| MSR1L_30810 | 3.255.094 | MGMSRv2_3362 | 3.431.344 | n | cofactor biosynthesis                 | molybdenum cofactor biosynthesis protein MoaA                   | 0,087 | 1,16 | ++  | +++ |  |
| MSR1L_30910 | ?         | MGMSRv2_3373 | 3.444.257 | n | cell wall formation                   | putative glycosyltransferase, family 2                          | 0,246 | 1,12 | ++  | +++ |  |
| MSR1L_30910 | ?         | MGMSRv2_3373 | 3.444.658 | n | cell wall formation                   | putative glycosyltransferase, family 2                          | 0,09  | 1,18 | ++  | +++ |  |
| MSR1L_30920 | 3.267.147 | MGMSRv2_3374 | 3.445.257 | n | ?                                     | conserved protein of unknown function                           | 0,146 | 1,05 | ++  | +++ |  |
| MSR1L_30930 | 3.267.623 | MGMSRv2_3375 | 3.445.480 | n | ?                                     | exported protein, SAM-dependent methyltransferase               | 0,221 | 1,16 | +++ | +++ |  |
| MSR1L_30940 | ?         | MGMSRv2_3376 | 3.446.709 | n | cell wall formation                   | putative NAD-dependent epimerase/dehydratase                    | 0,084 | 1,03 | ++  | +++ |  |
| MSR1L_30940 | ?         | MGMSRv2_3376 | 3.447.280 | n | cell wall formation                   | putative NAD-dependent epimerase/dehydratase                    | 0,06  | 1,31 | ++  | +++ |  |
| MSR1L_30940 | 3.268.871 | MGMSRv2_3376 | 3.447.520 | n | cell wall formation                   | putative NAD-dependent epimerase/dehydratase                    | 0,115 | 1,05 | ++  | +++ |  |
| MSR1L_30940 | ?         | MGMSRv2_3376 | 3.447.526 | n | cell wall formation                   | putative NAD-dependent epimerase/dehydratase                    | 0,211 | 1,21 | +++ | +++ |  |
| MSR1L_30940 | ?         | MGMSRv2_3376 | 3.447.644 | n | cell wall formation                   | putative NAD-dependent epimerase/dehydratase                    | 0,22  | 1,28 | +++ | +++ |  |
| MSR1L_27160 | 2.886.228 | MGMSRv2_3583 | 3.663.641 | n | peptide hydrolysis                    | putative Xaa-Pro aminopeptidase                                 | 0,198 | 1,35 | +++ | +++ |  |
| MSR1L_27190 | 2.889.708 | MGMSRv2_3586 | 3.668.956 | n | glutathione metabolism                | 5-oxoprolinase OplA                                             | 0,128 | 1,49 | ++  | +++ |  |
| MSR1L_26800 | 2.847.442 | MGMSRv2_3727 | 3.811.056 | n | chemotaxis?                           | CheR-like methyltransferase with C-terminal TPR-domain          | 0,131 | 1,13 | ++  | +++ |  |
| MSR1L_25740 | 2.733.921 | MGMSRv2_3840 | 3.936.201 | n | cell wall formation                   | lipopolysaccharide assembly protein A-domain containing protein | 0,15  | 0    | +++ | +++ |  |
| MSR1L_24680 | 2.631.081 | MGMSRv2_3945 | 4.036.591 | n | cofactor biosynthesis                 | ATP:cob(I)alamin adenosyltransferase                            | 0,209 | 1,18 | +++ | +++ |  |
| MSR1L_24530 | 2.614.968 | MGMSRv2_3963 | 4.053.246 | n | ?                                     | conserved inner membrane protein, DUF420                        | 0,185 | 1,24 | +++ | +++ |  |
| MSR1L_24260 | 2.590.538 | MGMSRv2_3992 | 4.078.926 | n | signaling, MCP                        | methyl-accepting chemotaxis receptor                            | 0,1   | 1,57 | +++ | +++ |  |

|              |                                                        |                            |                                              |                               |                                    |                                                                                       |            |        |                   |         |                    |          |
|--------------|--------------------------------------------------------|----------------------------|----------------------------------------------|-------------------------------|------------------------------------|---------------------------------------------------------------------------------------|------------|--------|-------------------|---------|--------------------|----------|
| MSR1L_24180  | ?                                                      | MGMSRv2_4002               | 4.089.167                                    | n                             | membrane lipid modification?       | conserved membrane protein of unknown function, phosphatidylglycerol lysyltransferase | 0,118      | 1,06   | ++                | +++     |                    |          |
| MSR1L_24180  | ?                                                      | MGMSRv2_4002               | 4.089.537                                    | n                             | membrane lipid modification?       | conserved membrane protein of unknown function, phosphatidylglycerol lysyltransferase | 0,179      | 1,22   | +++               | +++     |                    |          |
| MSR1L_39470  | 4.123.757                                              | MGMSRv2_4227               | 4.332.947                                    | n                             | carbon metabolism, gluconeogenesis | pyruvate phosphate dikinase PpdK                                                      | 0,1        | 1,13   | ++                | +++     |                    |          |
| MSR1L_39620  | 4.136.506                                              | MGMSRv2_4243               | 4.346.854                                    | n                             | signaling, histidine kinase        | sensor histidine kinase                                                               | 0,233      | 1,21   | +++               | +++     |                    |          |
| MSR1L_26530  | 2.811.416                                              | MGMSRv2_5S_rRNA_2          | 2.085.763                                    | n                             | ribosome component                 | 5S_rRNA_2                                                                             | 0,14       | 1,13   | +++               | +++     |                    |          |
| MSR1L_02570  | 262.088                                                | MGMSRv2_5S_rRNA_2          | ?                                            | n                             | ribosome component                 | 5S_rRNA_2                                                                             | 0,14       | 1,13   | +++               | +++     |                    |          |
| <b>inMAI</b> | Locus-tag MSR1(L), GenBank acc. CP027526, CP027527 (4) | Insertion position MSR1(L) | Locus-tag MGMSRv2, GenBank acc. HG794546 (5) | Insertion Position in MGMSRv2 | inMAI = n, exMAI = y               | (putative) functional category                                                        | Annotation | Growth | Magnetic response | Growth2 | Magnetic response2 | comments |
|              | MSR1L_03470                                            | 335.203                    | MGMSRv2_2368                                 | 2.489.301                     | y                                  |                                                                                       | MamB       | 0,205  | 0                 | +++     | -                  |          |
|              | MSR1L_03420                                            | 330.858                    | MGMSRv2_2373                                 | 2.493.753                     | y                                  |                                                                                       | MamO       | 0,103  | 0,04              | ++      | -                  |          |
|              | MSR1L_03380                                            | 327.097                    | MGMSRv2_2377                                 | 2.497.515                     | y                                  |                                                                                       | MamK       | 0,103  | 0,04              | ++      | -                  |          |
|              | MSR1L_03360                                            | ?                          | MGMSRv2_2379                                 | 2.500.968                     | y                                  |                                                                                       | MamE       | 0,224  | 0                 | +++     | -                  |          |
|              | MSR1L_03470                                            | ?                          | MGMSRv2_2368                                 | ?                             | y                                  |                                                                                       | MamB       | 0,176  | 0                 | +++     | -                  |          |
|              | MSR1L_03470                                            | ?                          | MGMSRv2_2368                                 | ?                             | y                                  |                                                                                       | MamB       | 0,181  | 0                 | +++     | -                  |          |
|              | MSR1L_03390                                            | 327.647                    | MGMSRv2_2377                                 | ?                             | y                                  |                                                                                       | MamL       | 0,261  | 0                 | +++     | -                  |          |
|              | MSR1L_03380                                            | 326.862                    | MGMSRv2_2377                                 | 2.479.749                     | y                                  |                                                                                       | MamK       | 0,104  | 0,03              | ++      | -                  |          |
|              | MSR1L_03470                                            | ?                          | MGMSRv2_2368                                 | 2.489.212                     | y                                  |                                                                                       | MamB       | 0,146  | 0                 | ++      | -                  |          |
|              | MSR1L_03470                                            | ?                          | MGMSRv2_2368                                 | 2.489.586                     | y                                  |                                                                                       | MamB       | 0,125  | 0                 | ++      | -                  |          |
|              | MSR1L_03470                                            | 334.986                    | MGMSRv2_2368                                 | 2.489.609                     | y                                  |                                                                                       | MamB       | 0,162  | 0                 | ++      | -                  |          |
|              | MSR1L_03450                                            | ?                          | MGMSRv2_2370                                 | 2.490.149                     | y                                  |                                                                                       | MamQ       | 0,199  | 0                 | +++     | -                  |          |
|              | MSR1L_03450                                            | ?                          | MGMSRv2_2370                                 | 2.490.387                     | y                                  |                                                                                       | MamQ       | 0,119  | 0                 | ++      | -                  |          |
|              | MSR1L_03450                                            | ?                          | MGMSRv2_2370                                 | 2.490.500                     | y                                  |                                                                                       | MamQ       | 0,197  | 0                 | +++     | -                  |          |
|              | MSR1L_03450                                            | ?                          | MGMSRv2_2370                                 | 2.490.548                     | y                                  |                                                                                       | MamQ       | 0,188  | 0                 | +++     | -                  |          |
|              | MSR1L_03440                                            | ?                          | MGMSRv2_2371                                 | 2.491.210                     | y                                  |                                                                                       | MamA       | 0,217  | 0                 | +++     | -                  |          |
|              | MSR1L_03430                                            | ?                          | MGMSRv2_2372                                 | 2.492.065                     | y                                  |                                                                                       | MamP       | 0,177  | 0                 | +++     | -                  |          |
|              | MSR1L_03420                                            | ?                          | MGMSRv2_2373                                 | 2.492.720                     | y                                  |                                                                                       | MamO       | 0,209  | 0                 | +++     | -                  |          |
|              | MSR1L_03420                                            | ?                          | MGMSRv2_2373                                 | 2.492.799                     | y                                  |                                                                                       | MamO       | 0,233  | 0                 | +++     | -                  |          |
|              | MSR1L_03420                                            | ?                          | MGMSRv2_2373                                 | 2.492.922                     | y                                  |                                                                                       | MamO       | 0,195  | 0                 | +++     | -                  |          |
|              | MSR1L_03420                                            | ?                          | MGMSRv2_2373                                 | 2.493.134                     | y                                  |                                                                                       | MamO       | 0,195  | 0                 | +++     | -                  |          |
|              | MSR1L_03420                                            | 330.654                    | MGMSRv2_2373                                 | 2.493.431                     | y                                  |                                                                                       | MamO       | 0,2    | 0                 | +++     | -                  |          |
|              | MSR1L_03420                                            | 331.008                    | MGMSRv2_2373                                 | 2.493.584                     | y                                  |                                                                                       | MamO       | 0,203  | 0                 | +++     | -                  |          |
|              | MSR1L_03420                                            | ?                          | MGMSRv2_2373                                 | 2.493.591                     | y                                  |                                                                                       | MamO       | 0,124  | 0                 | ++      | -                  |          |
|              | MSR1L_03420                                            | 330.506                    | MGMSRv2_2373                                 | 2.493.908                     | y                                  |                                                                                       | MamO       | 0,178  | 0                 | +++     | -                  |          |
|              | MSR1L_03420                                            | 330.542                    | MGMSRv2_2373                                 | 2.494.052                     | y                                  |                                                                                       | MamO       | 0,176  | 0                 | +++     | -                  |          |
|              | MSR1L_03410                                            | ?                          | MGMSRv2_2374                                 | 2.494.784                     | y                                  |                                                                                       | MamN       | 0,113  | 0                 | ++      | -                  |          |
|              | MSR1L_03400                                            | 328.406                    | MGMSRv2_2375                                 | 2.495.915                     | y                                  |                                                                                       | MamM       | 0,199  | 0                 | +++     | -                  |          |
|              | MSR1L_03400                                            | 328.399                    | MGMSRv2_2375                                 | 2.495.915                     | y                                  |                                                                                       | MamM       | 0,143  | 0                 | ++      | -                  |          |
|              | MSR1L_03400                                            | ?                          | MGMSRv2_2375                                 | 2.495.960                     | y                                  |                                                                                       | MamM       | 0,116  | 0                 | ++      | -                  |          |
|              | MSR1L_03400                                            | ?                          | MGMSRv2_2375                                 | 2.496.081                     | y                                  |                                                                                       | MamM       | 0,115  | 0                 | ++      | -                  |          |
|              | MSR1L_03400                                            | 328.397                    | MGMSRv2_2375                                 | 2.496.206                     | y                                  |                                                                                       | MamM       | 0,096  | 0,03              | ++      | -                  |          |
|              | MSR1L_03400                                            | ?                          | MGMSRv2_2375                                 | 2.496.274                     | y                                  |                                                                                       | MamM       | 0,119  | 0                 | ++      | -                  |          |
|              | MSR1L_03400                                            | ?                          | MGMSRv2_2375                                 | 2.496.387                     | y                                  |                                                                                       | MamM       | 0,065  | 0                 | ++      | -                  |          |

|                    |             |              |              |           |   |               |      |       |      |     |   |  |
|--------------------|-------------|--------------|--------------|-----------|---|---------------|------|-------|------|-----|---|--|
| inMAI non-magnetic | MSR1L_03400 | ?            | MGMSRv2_2375 | 2.496.401 | y |               | MamM | 0,014 | 0    | +   | - |  |
|                    | MSR1L_03400 | ?            | MGMSRv2_2375 | 2.496.620 | y |               | MamM | 0,203 | 0    | +++ | - |  |
|                    | MSR1L_03400 | ?            | MGMSRv2_2375 | 2.496.643 | y |               | MamM | 0,198 | 0    | +++ | - |  |
|                    | MSR1L_03380 | ?            | MGMSRv2_2378 | 2.499.214 | y |               | MamJ | 0,1   | 0,02 | +++ | - |  |
|                    | MSR1L_03360 | ?            | MGMSRv2_2379 | 2.500.017 | y |               | MamE | 0,222 | 0    | +++ | - |  |
|                    | MSR1L_03360 | 324.627      | MGMSRv2_2379 | 2.500.104 | y |               | MamE | 0,208 | 0    | +++ | - |  |
|                    | MSR1L_03360 | ?            | MGMSRv2_2379 | 2.500.835 | y |               | MamE | 0,227 | 0    | +++ | - |  |
|                    | MSR1L_03360 | 323.338      | MGMSRv2_2379 | 2.501.382 | y |               | MamE | 0,185 | 0    | +++ | - |  |
|                    | MSR1L_03360 | ?            | MGMSRv2_2379 | 2.501.635 | y |               | MamE | 0,251 | 0    | +++ | - |  |
|                    | MSR1L_03360 | ?            | MGMSRv2_2379 | 2.501.720 | y |               | MamE | 0,11  | 0    | ++  | - |  |
|                    | MSR1L_03350 | ?            | MGMSRv2_2380 | 2.501.994 | y |               | MamI | 0,135 | 0    | ++  | - |  |
|                    | MSR1L_03180 | 308.180      | MGMSRv2_2396 | 2.515.601 | y |               | Mms6 | 0,071 | 0    | ++  | - |  |
|                    | MSR1L_03470 | 335.431      | MGMSRv2_2368 | ?         | y |               | MamB | 0,12  | 0    | +++ | - |  |
|                    | MSR1L_03450 | 334.362      | MGMSRv2_2370 | ?         | y |               | MamQ | 0,15  | 0    | +++ | - |  |
|                    | MSR1L_03440 | 333.456      | MGMSRv2_2371 | ?         | y |               | MamA | 0,092 | 0    | ++  | - |  |
|                    | MSR1L_03440 | 333.129      | MGMSRv2_2371 | ?         | y |               | MamA | 0,13  | 0    | +++ | - |  |
|                    | MSR1L_03440 | 333.251      | MGMSRv2_2371 | ?         | y |               | MamA | 0,11  | 0    | +++ | - |  |
|                    | MSR1L_03440 | 333.218      | MGMSRv2_2371 | ?         | y |               | MamA | 0,13  | 0    | +++ | - |  |
|                    | MSR1L_03420 | 332.100      | MGMSRv2_2373 | ?         | y |               | MamO | 0,198 | 0    | +++ | - |  |
|                    | MSR1L_03420 | 330.506      | MGMSRv2_2373 | ?         | y |               | MamO | 0,185 | 0    | +++ | - |  |
|                    | MSR1L_03420 | 330.282      | MGMSRv2_2373 | ?         | y |               | MamO | 0,13  | 0    | +++ | - |  |
|                    | MSR1L_03420 | 330.879      | MGMSRv2_2373 | ?         | y |               | MamO | 0,19  | 0    | +++ | - |  |
|                    | MSR1L_03420 | 330.927      | MGMSRv2_2373 | ?         | y |               | MamO | 0,14  | 0    | +++ | - |  |
|                    | MSR1L_03410 | 329.389      | MGMSRv2_2374 | ?         | y |               | MamN | 0,14  | 0    | +++ | - |  |
|                    | MSR1L_03410 | 329.084      | MGMSRv2_2374 | ?         | y |               | MamN | 0,13  | 0    | +++ | - |  |
|                    | MSR1L_03400 | 328.494      | MGMSRv2_2375 | ?         | y |               | MamM | 0,13  | 0    | +++ | - |  |
|                    | MSR1L_03400 | 328.494      | MGMSRv2_2375 | ?         | y |               | MamM | 0,13  | 0    | +++ | - |  |
|                    | MSR1L_03400 | 328.211      | MGMSRv2_2375 | ?         | y |               | MamM | 0,16  | 0    | +++ | - |  |
|                    | MSR1L_03400 | 327.960      | MGMSRv2_2375 | ?         | y |               | MamM | 0,14  | 0    | +++ | - |  |
|                    | MSR1L_03400 | 328.601      | MGMSRv2_2375 | ?         | y |               | MamM | 0,14  | 0    | +++ | - |  |
|                    | MSR1L_03400 | ?            | MGMSRv2_2375 | ?         | y |               | MamM | 0,14  | 0    | +++ | - |  |
|                    | MSR1L_03380 | 326.998      | MGMSRv2_2377 | ?         | y |               | MamK | 0,16  | 0    | +++ | - |  |
|                    | MSR1L_03380 | 327.270      | MGMSRv2_2377 | ?         | y |               | MamK | 0,14  | 0    | +++ | - |  |
|                    | MSR1L_03380 | 326.953      | MGMSRv2_2377 | ?         | y |               | MamK | 0,14  | 0    | +++ | - |  |
|                    | MSR1L_03360 | 323.068      | MGMSRv2_2379 | ?         | y |               | MamE | 0,176 | 0    | +++ | - |  |
|                    | MSR1L_03360 | 323.475      | MGMSRv2_2379 | ?         | y |               | MamE | 0,176 | 0    | +++ | - |  |
|                    | MSR1L_03360 | 323.823      | MGMSRv2_2379 | ?         | y |               | MamE | 0,193 | 0    | +++ | - |  |
|                    | MSR1L_03360 | 323.688      | MGMSRv2_2379 | ?         | y |               | MamE | 0,188 | 0    | +++ | - |  |
|                    | MSR1L_03360 | 324.735      | MGMSRv2_2379 | ?         | y |               | MamE | 0,15  | 0    | +++ | - |  |
|                    | MSR1L_03360 | 322.931      | MGMSRv2_2379 | ?         | y |               | MamE | 0,16  | 0    | +++ | - |  |
| MSR1L_03360        | 323.936     | MGMSRv2_2379 | ?            | y         |   | MamE          | 0,13 | 0     | +++  | -   |   |  |
| MSR1L_03360        | 323.088     | MGMSRv2_2379 | ?            | y         |   | MamE          | 0,15 | 0     | +++  | -   |   |  |
| MSR1L_03360        | 324.141     | MGMSRv2_2379 | ?            | y         |   | MamE          | 0,2  | 0     | +++  | -   |   |  |
| magnetic           | MSR1L_03440 | 333.610      | MGMSRv2_2371 | ?         | y |               | MamA | 0,12  | 0,85 | +++ | + |  |
|                    | MSR1L_03440 | 333.610      | MGMSRv2_2371 | ?         | y |               | MamA | 0,14  | 0,89 | +++ | + |  |
|                    | MSR1L_03380 | 327.473      | MGMSRv2_2377 | ?         | y |               | MamK | 0,103 | 0,44 | +   | + |  |
|                    | MSR1L_03860 | 368.977      | MGMSRv2_2323 | 2.459.845 | y |               | MamZ | 0,092 | 0,1  | ++  | + |  |
|                    | MSR1L_03470 | ?            | MGMSRv2_2368 | 2.489.408 | y |               | MamB | 0,177 | 0,1  | +++ | + |  |
|                    | MSR1L_03430 | ?            | MGMSRv2_2372 | 2.491.610 | y | magnetochrome | MamP | 0,151 | 0,07 | +++ | + |  |
|                    | MSR1L_03420 | ?            | MGMSRv2_2373 | 2.492.443 | y |               | MamO | 0,105 | 0,23 | +++ | + |  |
|                    | MSR1L_03410 | ?            | MGMSRv2_2374 | 2.494.624 | y |               | MamN | 0,104 | 0,11 | +++ | + |  |
|                    | MSR1L_03410 | ?            | MGMSRv2_2374 | 2.494.745 | y |               | MamN | 0,111 | 0,06 | +++ | + |  |
|                    | MSR1L_03380 | 327.647      | MGMSRv2_2377 | 2.497.478 | y |               | MamK | 0,147 | 0    | +++ | + |  |



|                  |             |              |              |           |   |               |       |       |      |     |     |  |
|------------------|-------------|--------------|--------------|-----------|---|---------------|-------|-------|------|-----|-----|--|
| inMAI weakly n   | MSR1L_03430 | 332.899      | MGMSRv2_2372 | ?         | y | magnetochrome | MamP  | 0,15  | 0,06 | +++ | +   |  |
|                  | MSR1L_03870 | 369.755      | MGMSRv2_2322 | 2.457.648 | y | magnetochrome | MamX  | 0,131 | 1,16 | ++  | ++  |  |
|                  | MSR1L_03380 | 326.953      | MGMSRv2_2377 | ?         | y |               | MamK  | 0,14  | 0,87 | +++ | ++  |  |
|                  | MSR1L_03160 | 307.382      | MGMSRv2_2398 | ?         | y |               | Mms36 | 0,103 | 0,72 | +++ | ++  |  |
|                  | MSR1L_02670 | 270.213      | MGMSRv2_2312 | 2.446.983 | y |               | FeoB1 | 0,156 | 0,75 | ++  | ++  |  |
|                  | MSR1L_02660 | ?            | MGMSRv2_2313 | 2.447.939 | y |               | FeoA1 | 0,144 | 0,93 | ++  | ++  |  |
|                  | MSR1L_03870 | ?            | MGMSRv2_2322 | 2.457.856 | y | magnetochrome | MamX  | 0,204 | 0,96 | +++ | ++  |  |
|                  | MSR1L_03460 | ?            | MGMSRv2_2369 | 2.489.871 | y |               | MamR  | 0,144 | 0,81 | ++  | ++  |  |
|                  | MSR1L_03350 | ?            | MGMSRv2_2380 | 2.502.080 | y |               | MamI  | 0,107 | 0,62 | +++ | ++  |  |
|                  | MSR1L_03180 | 308.146      | MGMSRv2_2396 | 2.515.559 | y |               | Mms6  | 0,133 | 0,81 | +++ | ++  |  |
|                  | MSR1L_03170 | 307.881      | MGMSRv2_2397 | 2.515.856 | y |               | MmsF  | 0,132 | 0,72 | ++  | ++  |  |
|                  | MSR1L_03470 | 334.986      | MGMSRv2_2368 | ?         | y |               | MamB  | 0,15  | 0,6  | +++ | ++  |  |
| MSR1L_03340      | 321.630     | MGMSRv2_2381 | ?            | y         |   | MamH          | 0,106 | 0,68  | ++   | ++  |     |  |
| inMAI WTmagnetic | MSR1L_03460 | ?            | MGMSRv2_2369 | 2.490.029 | y |               | MamR  | 0,229 | 1,1  | +++ | +++ |  |
|                  | MSR1L_03430 | ?            | MGMSRv2_2372 | 2.491.777 | y | magnetochrome | MamP  | 0,271 | 1,27 | +++ | +++ |  |
|                  | MSR1L_03340 | 321.870      | MGMSRv2_2381 | ?         | y |               | MamH  | 0,11  | 1,37 | +++ | +++ |  |
|                  | MSR1L_02670 | 271.399      | MGMSRv2_2312 | 2.446.529 | y |               | FeoB1 | 0,137 | 1,01 | ++  | +++ |  |
|                  | MSR1L_02660 | 269.922      | MGMSRv2_2313 | 2.447.981 | y |               | FeoA1 | 0,153 | 1,47 | ++  | +++ |  |
|                  | MSR1L_03490 | 336.337      | MGMSRv2_2366 | 2.488.276 | y | magnetochrome | MamT  | 0,249 | 1,34 | +++ | +++ |  |
|                  | MSR1L_03420 | ?            | MGMSRv2_2373 | 2.492.921 | y |               | MamO  | 0,124 | 1,43 | ++  | +++ |  |
|                  | MSR1L_03420 | ?            | MGMSRv2_2373 | 2.493.652 | y |               | MamO  | 0,295 | 1,43 | +++ | +++ |  |
|                  | MSR1L_03410 | ?            | MGMSRv2_2374 | 2.495.482 | y |               | MamN  | 0,118 | 1,35 | ++  | +++ |  |
|                  | MSR1L_03380 | ?            | MGMSRv2_2377 | 2.497.629 | y |               | MamK  | 0,271 | 1,27 | +++ | +++ |  |
|                  | MSR1L_03360 | ?            | MGMSRv2_2379 | 2.501.663 | y | magnetochrome | MamE  | 0,263 | 1,1  | +++ | +++ |  |
|                  | MSR1L_03340 | ?            | MGMSRv2_2381 | 2.502.366 | y |               | MamH  | 0,135 | 1,03 | ++  | +++ |  |
|                  | MSR1L_03340 | ?            | MGMSRv2_2381 | 2.502.685 | y |               | MamH  | 0,131 | 1,13 | ++  | +++ |  |
|                  | MSR1L_03180 | 308.322      | MGMSRv2_2396 | 2.515.809 | y |               | Mms6  | 0,118 | 1,41 | ++  | +++ |  |
|                  | MSR1L_02670 | 270.908      | MGMSRv2_2312 | ?         | y |               | FeoB1 | 0,15  | 1,16 | +++ | +++ |  |
|                  | MSR1L_02670 | 271.404      | MGMSRv2_2312 | ?         | y |               | FeoB1 | 0,249 | 1,34 | +++ | +++ |  |
|                  | MSR1L_03870 | 369.042      | MGMSRv2_2322 | ?         | y | magnetochrome | MamX  | 0,16  | 1,11 | +++ | +++ |  |
|                  | MSR1L_03860 | 368.933      | MGMSRv2_2323 | ?         | y |               | MamZ  | 0,1   | 1,36 | +++ | +++ |  |
| MSR1L_03420      | 330.630     | MGMSRv2_2373 | ?            | y         |   | MamO          | 0,13  | 1,48  | +++  | +++ |     |  |
| MSR1L_03410      | 329.389     | MGMSRv2_2374 | ?            | y         |   | MamN          | 0,11  | 1,07  | +++  | +++ |     |  |

**Table S2.B. Tn5 insertion clones selected as Nmag/Wmag during visual screening of the mutagenesis library.**

| Locus-tag MSR1(L), GenBank acc. CP027526, CP027527 (R. Uebe et al, Genome Announc 6, 2018) | Insertion position MSR1(L) | Locus-tag MGMSRV2, GenBank acc. HG794546 (X. Wang et al., Genome Announc 2, 2014) | Insertion Position in MGMSRV2 | inMAI = n, exMAI = y | (putative) functional category | Annotation                                        | Comments                                                                                                                                                                                    |
|--------------------------------------------------------------------------------------------|----------------------------|-----------------------------------------------------------------------------------|-------------------------------|----------------------|--------------------------------|---------------------------------------------------|---------------------------------------------------------------------------------------------------------------------------------------------------------------------------------------------|
| MSR1L_00320                                                                                | 35.238                     | MGMSRV2_0021                                                                      | 22.170                        | n                    | RNA                            | RmlB-23S RNA methyltransferase                    | <i>rmlB</i>                                                                                                                                                                                 |
| MSR1L_01530                                                                                | 145.647                    | MGMSRV2_0142                                                                      | 133.754                       | n                    | ?                              | exported protein of unknown function              | DUF839; TAT-signal!                                                                                                                                                                         |
| MSR1L_20490                                                                                | ?                          | MGMSRV2_0149                                                                      | 150.840                       | n                    | toxin?                         | conserved protein of unknown function             | huge ORF (31 kb)!                                                                                                                                                                           |
| MSR1L_20280                                                                                | 2.124.592                  | MGMSRV2_0173                                                                      | 203.045                       | n                    | cell wall?                     | transglutaminase-like protein                     | DUF2126                                                                                                                                                                                     |
| MSR1L_20040                                                                                | 2.095.720                  | MGMSRV2_0195                                                                      | ?                             | n                    | redox                          | aldehyde dehydrogenase                            |                                                                                                                                                                                             |
| MSR1L_19820                                                                                | 2.071.226                  | MGMSRV2_0217                                                                      | 256.053                       | n                    | ?                              | conserved protein of unknown function             | TPR-protein? long operon 210-222! SrfC and SrfB (virulence effectors) encoded right upstream                                                                                                |
| MSR1L_19720                                                                                | 2.056.697                  | MGMSRV2_0227                                                                      | 270.168                       | n                    | purine catabolism              | aminotransferase class V, purine catabolism       | <i>pucG</i>                                                                                                                                                                                 |
| MSR1L_19360                                                                                | 2.023.570                  | MGMSRV2_0266                                                                      | ?                             | n                    | protein secretion?             | adhesive surface protein, hemeagglutinin-like?    |                                                                                                                                                                                             |
| MSR1L_19350                                                                                | 2.019.808                  | MGMSRV2_0267                                                                      | ?                             | n                    | protein secretion?             | outer membrane efflux protein                     | PF02321; 14 proteins in MSR-1                                                                                                                                                               |
| MSR1L_19350                                                                                | 2.019.808                  | MGMSRV2_0267                                                                      | ?                             | n                    | protein secretion?             | outer membrane efflux protein                     | PF02321; 14 proteins in MSR-1                                                                                                                                                               |
| MSR1L_18700                                                                                | 1.957.720                  | MGMSRV2_0345                                                                      | ?                             | n                    | nitrogen                       | nitrogenase iron protein NifH                     | binds 4Fe-4S-cluster                                                                                                                                                                        |
| MSR1L_18160                                                                                | 1.912.974                  | MGMSRV2_0397                                                                      | ?                             | n                    | storage                        | polyphosphate kinase                              | <i>ppK</i>                                                                                                                                                                                  |
| MSR1L_17970                                                                                | 1.885.282                  | MGMSRV2_0417                                                                      | ?                             | n                    | transporter                    | ABC-transporter, substrate-binding protein        | Leu-binding? Leu/Ile/Val-binding?                                                                                                                                                           |
| MSR1L_17970                                                                                | 1.884.455                  | MGMSRV2_0417                                                                      | ?                             | n                    | transporter                    | ABC-transporter, substrate-binding protein        | Leu-binding? Leu/Ile/Val-binding?                                                                                                                                                           |
| MSR1L_17900                                                                                | 1.880.358                  | MGMSRV2_0424                                                                      | 459.294                       | n                    | transporter                    | ABC-transporter, ATPase component                 | <i>hmuV</i> (hemine transporter?)<br><i>fecCD</i> (ABC transporter ferric iron dicitrate permease and ABC transporter ferric iron hydroxamate periplasmic binding protein encoded upstream) |
| MSR1L_17870                                                                                | 1.876.175                  | MGMSRV2_0427                                                                      | 463.722                       | n                    | transporter                    | TonB dependent receptor                           |                                                                                                                                                                                             |
| MSR1L_17860                                                                                | 1.875.950                  | MGMSRV2_0428                                                                      | 464.592                       | n                    | regulator                      | AraC-type DNA - binding domain containing protein | transcriptional regulator                                                                                                                                                                   |
| MSR1L_17500                                                                                | 1.835.661                  | MGMSRV2_0463                                                                      | ?                             | n                    | signaling, His-kin/RR          | His-kinase-response regulator hybrid              | GAF-like + PAS + His-Kin + RR                                                                                                                                                               |
| MSR1L_17450                                                                                | 1.830.615                  | MGMSRV2_0468                                                                      | 508.148                       | n                    | sulfur                         | sulfite reductase                                 |                                                                                                                                                                                             |
| MSR1L_17450                                                                                | ?                          | MGMSRV2_0468                                                                      | 508.665                       | n                    | sulfur                         | sulfite reductase                                 |                                                                                                                                                                                             |
| MSR1L_17450                                                                                | ?                          | MGMSRV2_0468                                                                      | 509.262                       | n                    | sulfur                         | sulfite reductase                                 |                                                                                                                                                                                             |

|             |           |              |         |   |                         |                                                                                       |                                                   |
|-------------|-----------|--------------|---------|---|-------------------------|---------------------------------------------------------------------------------------|---------------------------------------------------|
| MSR1L_17440 | 1.829.717 | MGMSRV2_0469 | 510.110 | n | sulfur                  | phosphoadenylyl-sulfate reductase (thioredoxin)                                       | <i>cysH</i>                                       |
| MSR1L_17440 | ?         | MGMSRV2_0469 | 510.114 | n | sulfur                  | phosphoadenylyl-sulfate reductase (thioredoxin)                                       | <i>cysH</i>                                       |
| MSR1L_17430 | ?         | MGMSRV2_0470 | 511.348 | n | sulfur                  | sulfate adenylyltransferase                                                           | <i>cysD</i>                                       |
| MSR1L_17430 | 1.829.014 | MGMSRV2_0470 | ?       | n | sulfur                  | sulfate adenylyltransferase                                                           | <i>cysD</i>                                       |
| MSR1L_17420 | ?         | MGMSRV2_0471 | 511.952 | n | sulfur                  | adenylylsulphate kinase                                                               | <i>cysC</i>                                       |
| MSR1L_17420 | ?         | MGMSRV2_0471 | 513.033 | n | sulfur                  | adenylylsulphate kinase                                                               | <i>cysC</i>                                       |
| MSR1L_17420 | ?         | MGMSRV2_0471 | 513.150 | n | sulfur                  | adenylylsulphate kinase                                                               | <i>cysC</i>                                       |
| MSR1L_17410 | 1.824.506 | MGMSRV2_0472 | ?       | n | signaling, His-kin      | His-kinase                                                                            | PAS, no HAMP, His-Kin                             |
| MSR1L_17180 | 1.799.009 | MGMSRV2_0495 | 539.233 | n | sulfur                  | cystathionine beta-lyase                                                              |                                                   |
| MSR1L_17040 | ?         | MGMSRV2_0511 | 556.223 | n | sulfur                  | disulfide bond formation protein DsbB                                                 | <i>dsbB</i>                                       |
| MSR1L_17040 | ?         | MGMSRV2_0511 | 556.260 | n | sulfur                  | disulfide bond formation protein DsbB                                                 | <i>dsbB</i>                                       |
| MSR1L_17040 | ?         | MGMSRV2_0511 | 556.447 | n | sulfur                  | disulfide bond formation protein DsbB                                                 | <i>dsbB</i>                                       |
| MSR1L_17010 | 1.782.185 | MGMSRV2_0514 | 557.729 | n | peptidase               | peptidase family M48 protein                                                          |                                                   |
| MSR1L_16940 | 1.776.119 | MGMSRV2_0521 | ?       | n | carbohydrate catabolism | glycogen debranching enzyme (family 13 glycoside hydrolase)                           | <i>glgX</i>                                       |
| MSR1L_16830 | 1.762.256 | MGMSRV2_0534 | ?       | n | ?                       | uncharacterized protein                                                               | 2 TM                                              |
| MSR1L_16790 | 1.751.203 | MGMSRV2_0538 | ?       | n | lipid metabolism        | biotin carboxylase                                                                    | <i>accC</i>                                       |
| MSR1L_16650 | 1.740.946 | MGMSRV2_0551 | 601.019 | n | phosphatase?            | rhodanese-like protein                                                                |                                                   |
| MSR1L_06530 | 647.482   | MGMSRV2_0592 | ?       | n | DNA                     | integrase                                                                             |                                                   |
| MSR1L_06710 | 670.859   | MGMSRV2_0611 | ?       | n | amino acid biosynthesis | asparagine synthetase (glutamine-hydrolyzing)                                         |                                                   |
| MSR1L_05360 | 527.032   | MGMSRV2_0647 | ?       | n | DNA                     | transposase                                                                           | IS4 family                                        |
| MSR1L_16340 | 1.706.551 | MGMSRV2_0730 | 765.000 | n | metabolism              | succinic semialdehyde dehydrogenase                                                   | <i>gabD</i> ; 4-amino-butyrate (GABA) degradation |
| MSR1L_06910 | 692.410   | MGMSRV2_0762 | ?       | n | ?                       | DUF1398 protein                                                                       |                                                   |
| MSR1L_14490 | 1.455.448 | MGMSRV2_0813 | ?       | n | regulator?              | cupin-domain protein                                                                  | transcription factor?                             |
| MSR1L_14380 | 1.438.539 | MGMSRV2_0824 | 861.701 | n | transporter             | outer membrane efflux protein                                                         |                                                   |
| MSR1L_13600 | 1.349.563 | MGMSRV2_0902 | ?       | n | signaling, His-kin      | His-kinase                                                                            | x, no PAS, no HAMP, His-Kin                       |
| MSR1L_13120 | 1.304.145 | MGMSRV2_0947 | ?       | n | transporter             | high affinity branched-chain amino acid ABC transporter, permease protein (LivM-like) | 9 TM                                              |
| MSR1L_12940 | 1.284.321 | MGMSRV2_0965 | ?       | n | chemotaxis              | methyl-accepting chemotaxis protein                                                   | ?                                                 |
| MSR1L_12460 | 1.231.707 | MGMSRV2_1016 | ?       | n | metabolism              | acyl-CoA synthetase                                                                   |                                                   |
| MSR1L_11550 | 1.143.631 | MGMSRV2_1113 | ?       | n | signaling, His-kin      | His-kinase                                                                            | Chase, PAS, no HAMP, His-Kin                      |
| MSR1L_10740 | 1.061.185 | MGMSRV2_1185 | ?       | n | protein secretion       | type I secretion membrane fusion protein, HlyD family                                 | TIGR01843, 5 proteins in MSR-1                    |

|             |           |              |           |   |                                |                                                                                                 |                                                                                                                        |
|-------------|-----------|--------------|-----------|---|--------------------------------|-------------------------------------------------------------------------------------------------|------------------------------------------------------------------------------------------------------------------------|
| MSR1L_10260 | 1.012.228 | MGMSRV2_1231 | ?         | n | signaling, His-kin/RR          | His-kinase-response regulator hybrid (Hpt phosphotransfer)                                      |                                                                                                                        |
| MSR1L_10100 | 995.869   | MGMSRV2_1247 | ?         | n | ?                              | membrane protein                                                                                | 10 TM                                                                                                                  |
| MSR1L_10040 | 991.007   | MGMSRV2_1253 | ?         | n | ?                              | membrane protein                                                                                | 4 TM                                                                                                                   |
| MSR1L_09900 | 979.965   | MGMSRV2_1267 | 1.312.679 | n | transporter                    | TauE-like transmembrane protein                                                                 | 7 TM                                                                                                                   |
| MSR1L_09710 | 959.268   | MGMSRV2_1296 | ?         | n | aromatic amino acid catabolism | glutathione-S-transferase family protein                                                        |                                                                                                                        |
| MSR1L_09700 | 958.261   | MGMSRV2_1297 | 1.340.313 | n | amino acid catabolism          | fumarylacetoacetate (FAA) hydrolase                                                             |                                                                                                                        |
| MSR1L_09340 | 923.359   | MGMSRV2_1331 | 1.375.903 | n | peptidase                      | ATP-dependent ClpA-ClpP serine protease, proteolytic subunit ClpP                               | <i>Desulfovibrio magneticus</i> RS-1                                                                                   |
| MSR1L_09260 | 912.548   | MGMSRV2_1339 | ?         | n | competence, DNA-uptake?        | ComEC/Rec2-related protein                                                                      | transmembrane protein                                                                                                  |
| MSR1L_08990 | 886.867   | MGMSRV2_1366 | ?         | n | chemotaxis                     | methyl-accepting chemotaxis protein                                                             | 4HB_MCP_1 (4helix bundle sensory module)                                                                               |
| MSR1L_08380 | 831.371   | MGMSRV2_1404 | ?         | n | regulator                      | cNMP-binding Crp-type DNA-binding protein                                                       |                                                                                                                        |
| MSR1L_07420 | 741.545   | MGMSRV2_1505 | ?         | n | ?                              | uncharacterized protein                                                                         |                                                                                                                        |
| MSR1L_14690 | 1.475.592 | MGMSRV2_1531 | ?         | n | signaling                      | GGDEF-domain containing protein                                                                 | 6 TM; 30 proteins in MSR-1; 20 proteins in MSR-1 with additional EAL domain (and in part additional signaling domains) |
| MSR1L_14890 | 1.505.532 | MGMSRV2_1553 | ?         | n | redox                          | acyl-CoA dehydrogenase                                                                          |                                                                                                                        |
| MSR1L_15490 | 1.574.547 | MGMSRV2_1613 | ?         | n | Flp pilus-assembly?            | vWFA-protein                                                                                    |                                                                                                                        |
| MSR1L_15630 | ?         | MGMSRV2_1627 | 1.688.478 | n | PKS                            | conserved protein of unknown function containing polyketide synthase/Fatty acid synthase domain | huge orf! PKS (like 1629)!                                                                                             |
| MSR1L_15650 | 1.611.703 | MGMSRV2_1629 | ?         | n | PKS                            | polyketide synthase                                                                             |                                                                                                                        |
| MSR1L_15810 | 1.644.793 | MGMSRV2_1645 | ?         | n | metabolism                     | phosphoesterase                                                                                 |                                                                                                                        |
| MSR1L_15920 | 1.651.865 | MGMSRV2_1656 | ?         | n | chemotaxis                     | protein-glutamate methyltransferase                                                             | me-esterase CheB/me-transferase CheR/PAS domain                                                                        |
| MSR1L_16000 | 1.667.809 | MGMSRV2_1666 | ?         | n | signaling                      | signal transduction response regulator, receiver domain                                         | no output domain                                                                                                       |
| MSR1L_16010 | 1.668.040 | MGMSRV2_1667 | ?         | n | chemotaxis                     | protein-glutamate methyltransferase                                                             | me-esterase CheB/me-transferase CheR/His-kin/2xRR/GerE output                                                          |
| MSR1L_06180 | 611.172   | MGMSRV2_1694 | 1.793.463 | n | transporter                    | TrkA-C domain protein                                                                           | citrate transporter?                                                                                                   |
| MSR1L_05990 | 592.221   | MGMSRV2_1716 | 1.813.021 | n | nitrogen                       | nitric oxide reductase, subunit B                                                               | <i>norB</i>                                                                                                            |
| MSR1L_05980 | 591.755   | MGMSRV2_1717 | 1.814.067 | n | nitrogen                       | nitric oxide reductase, subunit C                                                               | <i>norC</i>                                                                                                            |

|             |             |              |              |           |                       |                                       |                                                         |                                                                                                                            |
|-------------|-------------|--------------|--------------|-----------|-----------------------|---------------------------------------|---------------------------------------------------------|----------------------------------------------------------------------------------------------------------------------------|
| exMFA       | MSR1L_04990 | 486.009      | MGMSRV2_1818 | 1.918.186 | n                     | transporter                           | TonB-dependent receptor                                 | TonB-copper (like OprC, NosA); also in Ca. Magnetovibrio chiemensis, Magnetobacterium bavaricum, Magnetobacterium casensis |
|             | MSR1L_04660 | 454.065      | MGMSRV2_1852 | ?         | n                     | cell wall                             | dTDP-glucose 4,6-dehydratase                            | <i>rfbB</i>                                                                                                                |
|             | MSR1L_04500 | 433.577      | MGMSRV2_1868 | 1.973.360 | n                     | chemotaxis                            | methyl-accepting chemotaxis protein                     | ?                                                                                                                          |
|             | MSR1L_04410 | 423.819      | MGMSRV2_1877 | 1.981.612 | n                     | chemotaxis                            | methyl-accepting chemotaxis protein                     | ?                                                                                                                          |
|             | MSR1L_04280 | 408.245      | MGMSRV2_1890 | ?         | n                     | carbohydrate catabolism               | beta-glucosidase                                        |                                                                                                                            |
|             | MSR1L_26390 | ?            | MGMSRV2_1971 | 2.068.765 | n                     | ?                                     | hypothetical protein                                    |                                                                                                                            |
|             | MSR1L_02470 | 251.139      | MGMSRV2_1991 | ?         | n                     | signaling, His-kin                    | His-kinase                                              | PAS, no HAMP, His-Kin                                                                                                      |
|             | MSR1L_02430 | 246.222      | MGMSRV2_1995 | ?         | n                     | ?                                     | uncharacterized protein                                 |                                                                                                                            |
|             | MSR1L_02420 | 245.417      | MGMSRV2_1996 | 2.102.495 | n                     | cofactor biosynthesis                 | carboxylesterase BioH                                   |                                                                                                                            |
|             | MSR1L_02200 | 215.216      | MGMSRV2_2018 | 2.133.125 | n                     | transporter                           | ABC transporter, urea, permease protein UrtB            |                                                                                                                            |
|             | MSR1L_01960 | 190.748      | MGMSRV2_2042 | ?         | n                     | transporter                           | transmembrane protein                                   | 2 EamA domains                                                                                                             |
|             | MSR1L_20760 | 2.207.517    | MGMSRV2_2080 | 2.196.443 | n                     | chemotaxis                            | signal transduction response regulator, receiver domain | SpoE II output domain                                                                                                      |
|             | MSR1L_21200 | ?            | MGMSRV2_2124 | 2.250.192 | n                     | transporter                           | arsenical pump-driving ATPase                           | <i>arsA</i> ; operon arsenical resistance                                                                                  |
|             | MSR1L_21370 | 2.280.101    | MGMSRV2_2142 | ?         | n                     | transporter                           | ABC-transporter, ATPase component                       | amino acid transport?                                                                                                      |
|             | MSR1L_21600 | 2.297.952    | MGMSRV2_2163 | ?         | n                     | transporter                           | TRAP-transporter, DctM                                  | C4-dicarboxylate transport                                                                                                 |
|             | MSR1L_21620 | 2.301.213    | MGMSRV2_2165 | ?         | n                     | transporter                           | TRAP-transporter (DctM-DctQ fused)                      | C4-dicarboxylate transport                                                                                                 |
|             | MSR1L_21840 | 2.332.970    | MGMSRV2_2186 | ?         | n                     | cell division                         | DNA translocase FtsK                                    |                                                                                                                            |
|             | MSR1L_22290 | 2.376.603    | MGMSRV2_2232 | ?         | n                     | ?                                     | DUF1285 protein                                         |                                                                                                                            |
|             | MSR1L_22710 | 2.420.191    | MGMSRV2_2274 | ?         | n                     | DNA                                   | replicative helicase                                    |                                                                                                                            |
|             | MSR1L_06450 | 640.814      | MGMSRV2_2462 | 2.576.698 | n                     | ?                                     | protein of unknown function                             | 1 TM (C-terminal)                                                                                                          |
|             | MSR1L_38450 | 4.016.350    | MGMSRV2_2470 | ?         | n                     | regulator                             | RNA polymerase sigma-70 factor RpoE                     | ECF family                                                                                                                 |
|             | MSR1L_38410 | 4.013.407    | MGMSRV2_2474 | ?         | n                     | DNA                                   | DNA mismatch repair protein MutL                        |                                                                                                                            |
|             | MSR1L_38130 | 3.988.532    | MGMSRV2_2501 | ?         | n                     | cell division                         | cell division protein FtsQ                              |                                                                                                                            |
|             | MSR1L_37510 | 3.931.308    | MGMSRV2_2614 | ?         | n                     | phage                                 | bacteriophage capsid protein                            |                                                                                                                            |
|             | MSR1L_36810 | 3.866.987    | MGMSRV2_2680 | ?         | n                     | regulator                             | RecX family protein                                     | interaction with RecA, modulation of RecA activity                                                                         |
|             | MSR1L_36680 | 3.853.609    | MGMSRV2_2693 | ?         | n                     | redox                                 | cyt c 551                                               |                                                                                                                            |
| MSR1L_36410 | 3.827.540   | MGMSRV2_2719 | 2.820.417    | n         | transporter           | ABC transporter, transmembrane region |                                                         |                                                                                                                            |
| MSR1L_36380 | 3.822.575   | MGMSRV2_2722 | ?            | n         | cofactor biosynthesis | decarboxylase                         | <i>ubiD</i> ; ubiquinone biosynthesis                   |                                                                                                                            |

|             |           |              |           |   |                                     |                                                         |                                                                                                                                |
|-------------|-----------|--------------|-----------|---|-------------------------------------|---------------------------------------------------------|--------------------------------------------------------------------------------------------------------------------------------|
| MSR1L_36360 | 3.819.429 | MGMSRV2_2724 | 2.829.888 | n | chemotaxis                          | methyl-accepting chemotaxis protein                     | sCache_2                                                                                                                       |
| MSR1L_35190 | 3.697.147 | MGMSRV2_2838 | ?         | n | signaling, His-kin                  | His-kinase                                              | ?                                                                                                                              |
| MSR1L_34390 | 3.623.849 | MGMSRV2_2917 | 3.016.900 | n | cell cycle regulation?              | histidine phosphotransferase                            | COG5385, downstream: <i>cheAWYBR!</i>                                                                                          |
| MSR1L_34150 | 3.600.893 | MGMSRV2_2954 | ?         | n | redox                               | cyt c oxidase cbb3-type, subunit I                      | <i>fixN/ccoN</i> ; 12 TM                                                                                                       |
| MSR1L_33860 | 3.580.323 | MGMSRV2_2984 | 3.071.684 | n | flagellum                           | flagellar biosynthetic protein FliR                     |                                                                                                                                |
| MSR1L_33760 | 3.567.138 | MGMSRV2_2994 | ?         | n | flagellum                           | flagellar hook length control protein FliK              |                                                                                                                                |
| MSR1L_33740 | 3.564.464 | MGMSRV2_2996 | 3.087.857 | n | flagellum                           | flagellar hook protein FlgE                             |                                                                                                                                |
| MSR1L_33740 | ?         | MGMSRV2_2996 | 3.087.850 | n | flagellum                           | flagellar hook protein FlgE                             |                                                                                                                                |
| MSR1L_33720 | 3.560.367 | MGMSRV2_2998 | ?         | n | redox                               | aldehyde dehydrogenase                                  |                                                                                                                                |
| MSR1L_33160 | 3.504.960 | MGMSRV2_3027 | 3.120.125 | n | cell wall                           | soluble lytic transglycosylase                          | murein degradation                                                                                                             |
| MSR1L_28770 | 3.049.447 | MGMSRV2_3148 | 3.227.887 | n | redox                               | cyt c-type protein, NapC/NirT multiheme cyt superfamily | Fur regulator right downstream (reverse 3149); Fur family protein upstream close (reverse 3137); NapC/NirT cytochrome c family |
| MSR1L_29160 | 3.086.350 | MGMSRV2_3189 | ?         | n | redox                               | heme lyase CcmF                                         | <i>ccmF</i>                                                                                                                    |
| MSR1L_29180 | 3.088.874 | MGMSRV2_3191 | ?         | n | redox                               | cyt c-type biogenesis protein CcmH                      | <i>ccmH</i>                                                                                                                    |
| MSR1L_29750 | 3.149.867 | MGMSRV2_3248 | ?         | n | cell wall                           | surface protein with repetitive structure               | unique domain structure with Big_6 and Big_3_3                                                                                 |
| MSR1L_29770 | 3.155.623 | MGMSRV2_3251 | ?         | n | transporter                         | RND efflux pump, membrane fusion protein                | TIGR01730; 11 proteins in MSR-1                                                                                                |
| MSR1L_29780 | 3.156.356 | MGMSRV2_3252 | ?         | n | transporter                         | biotin-lipoyl like domain of membrane fusion protein    |                                                                                                                                |
| MSR1L_30070 | 3.183.320 | MGMSRV2_3280 | 3.358.689 | n | RNA                                 | RsmD                                                    | 16S rRNA (guanine(966)-N(2))-methyltransferase, operon encoding RNA modifying proteins                                         |
| MSR1L_30080 | 3.183.944 | MGMSRV2_3281 | ?         | n | transporter?                        | Bax 1 inhibitor                                         | 7 TM; pH-dependent calcium leak across membrane                                                                                |
| MSR1L_30090 | 3.185.910 | MGMSRV2_3282 | ?         | n | transporter                         | ABC-transporter, substrate-binding protein              | branched chain amino acids?                                                                                                    |
| MSR1L_30300 | 3.207.002 | MGMSRV2_3303 | 3.381.111 | n | (close to nitrogen)                 | conserved protein of unknown function                   | in same direction right downstream recombinase (3302); a little further <i>glnK</i> and <i>amtB</i> (3299, 3298)               |
| MSR1L_30380 | 3.212.388 | MGMSRV2_3311 | ?         | n | cell division                       | Maf-like protein                                        | putative inhibitor of septum formation in euk, bacteria, archaea                                                               |
| MSR1L_30390 | ?         | MGMSRV2_3312 | 3.388.134 | n | regulator, (close to cell division) | pyruvate, phosphate dikinase regulatory protein         | in operon right upstream of maf (septum formation protein); heme biosyn genes downstream reverse                               |
| MSR1L_30580 | 3.229.922 | MGMSRV2_3331 | ?         | n | signaling, His-kin                  | His-kinase                                              | Chase, no HAMP, His-Kin                                                                                                        |

|                         |           |              |           |   |                             |                                                                                                |                                                                                   |
|-------------------------|-----------|--------------|-----------|---|-----------------------------|------------------------------------------------------------------------------------------------|-----------------------------------------------------------------------------------|
| MSR1L_30940             | ?         | MGMSRV2_3376 | 3.447.083 | n | cell wall                   | NAD-dependent epimerase/dehydratase                                                            |                                                                                   |
| MSR1L_31930             | 3.377.375 | MGMSRV2_3485 | ?         | n | cofactor biosynthesis       | GTP cyclohydrolase-2                                                                           | <i>ribA</i> ; riboflavin biosynthesis; cofactor of reductases?                    |
| MSR1L_27290             | 2.903.192 | MGMSRV2_3596 | ?         | n | peptidase                   | ATP-dependent ClpA-ClpP serine protease, specificity subunit ClpA                              |                                                                                   |
| MSR1L_27410             | 2.918.802 | MGMSRV2_3608 | 3.695.199 | n | tRNA, (close to chemotaxis) | tRNA N(6)-(t(6)A) methyltransferase                                                            | MtaB (radical SAM)                                                                |
| MSR1L_27740             | 2.953.002 | MGMSRV2_3644 | 3.731.153 | n | signaling, His-kin          | His-kinase                                                                                     |                                                                                   |
| MSR1L_27830             | 2.962.914 | MGMSRV2_3653 | 3.740.796 | n | RNA                         | ribosome-binding factor A                                                                      | <i>rbfA</i>                                                                       |
| MSR1L_28070             | 2.984.384 | MGMSRV2_3680 | ?         | n | transporter                 | multidrug resistance protein                                                                   | <i>norM</i> ? 11 TM; 2 MatE domains                                               |
| MSR1L_28090             | 2.986.821 | MGMSRV2_3682 | 3.765.579 | n | signaling                   | EAL-domain protein                                                                             | PF00990; 6 proteins in MSR-1                                                      |
| MSR1L_27100             | 2.876.769 | MGMSRV2_3696 | ?         | n | nitrogen                    | glutamate synthase [NADPH], small chain                                                        | <i>gltD</i> ; iron -sulfur cluster binding                                        |
| MSR1L_27050             | 2.874.384 | MGMSRV2_3702 | 3.785.117 | n | oxygen                      | bacterioferritin - Bfr1                                                                        | operon of 2 brf genes (deletion: no phenotype (R. Uebe pers. comm.))              |
| MSR1L_26040             | 2.766.830 | MGMSRV2_3810 | 3.904.094 | n | signaling                   | sensor histidine kinase, x domain + PAS/PAC domain                                             | N-terminal DUF3365                                                                |
| MSR1L_25790             | 2.738.640 | MGMSRV2_3835 | ?         | n | regulator                   | metal-sensitive transcriptional repressor                                                      | Cu, Ni, Co ion binding (Cys, His); transcriptional de-repression when metal bound |
| MSR1L_25430             | 2.702.740 | MGMSRV2_3871 | 3.964.834 | n | transporter                 | oligopeptide transporter subunit, periplasmic-binding component of ABC superfamily transporter | <i>appA</i>                                                                       |
| MSR1L_24980             | 2.658.206 | MGMSRV2_3916 | 4.009.636 | n | RNA                         | ATP-dependent RNA helicase SUV3, mitochondrial                                                 |                                                                                   |
| MSR1L_24760             | 2.638.710 | MGMSRV2_3937 | ?         | n | cofactor biosynthesis       | aminotransferase                                                                               | <i>pabB</i> ; para-aminobenzoate biosynthesis                                     |
| MSR1L_24200             | 2.582.539 | MGMSRV2_4000 | ?         | n | metal-binding?              | MEMO1 family protein                                                                           | TIGR00296 + TIGR04335                                                             |
| MSR1L_24180             | ?         | MGMSRV2_4002 | 4.089.064 | n | cell wall                   | membrane lipid lysyl-group transfer protein                                                    | 7 TM                                                                              |
| MSR1L_24180             | ?         | MGMSRV2_4002 | 4.089.287 | n | cell wall                   | membrane lipid lysyl-group transfer protein                                                    | 7 TM                                                                              |
| MSR1L_23570             | 2.518.977 | MGMSRV2_4044 | 4.141.463 | n | ?                           | conserved protein of unknown function                                                          |                                                                                   |
| MSR1L_23430/MSR1L_23440 | 2.506.037 | MGMSRV2_4057 | ?         | n | cell wall                   | surface antigen domain protein                                                                 | <i>omp</i>                                                                        |
| MSR1L_23090             | ?         | MGMSRV2_4091 | 4.188.964 | n | signaling, His-kin/RR       | signal transduction response regulator, receiver domain + PAS + HisKA + EAL + GGDF             | operon 4085-4092! starts with <i>flil</i> , <i>divk</i> right downstream of 4091! |
| MSR1L_39290             | 4.098.592 | MGMSRV2_4209 | ?         | n | TPR                         | TPR-domain protein                                                                             | glycosyl transferase family 9                                                     |
| MSR1L_39470             | 4.121.693 | MGMSRV2_4227 | 4.331.590 | n | metabolism                  | pyruvate, phosphate dikinase                                                                   | <i>ppdK</i>                                                                       |

inMAI

| Locus-tag MSR1(L), GenBank acc. CP027526, CP027527 (4) | Insertion position MSR1(L) | Locus-tag MGMSRV2, GenBank acc. HG794546 (5) | Insertion Position in MGMSRV2 | inMAI = n, exMAI = y | (putative) functional category | Annotation                     | Comments |
|--------------------------------------------------------|----------------------------|----------------------------------------------|-------------------------------|----------------------|--------------------------------|--------------------------------|----------|
| <b>MSR1L_02710</b>                                     | 274.133                    | <b>MGMSRV2_2308</b>                          | 2.443.699                     | y                    |                                | <b>vWFA-protein</b>            |          |
| MSR1L_02670                                            | 271.404                    | MGMSRV2_2312                                 | 2.446.524                     | y                    | iron                           | FeoB1                          |          |
| MSR1L_02670                                            | 271.169                    | MGMSRV2_2312                                 | 2.446.759                     | y                    | iron                           | FeoB1                          |          |
| MSR1L_02670                                            | 270.945                    | MGMSRV2_2312                                 | 2.447.282                     | y                    | iron                           | FeoB1                          |          |
| MSR1L_02670                                            | 270.908                    | MGMSRV2_2312                                 | 2.447.396                     | y                    | iron                           | FeoB1                          |          |
| MSR1L_02670                                            | 270.213                    | MGMSRV2_2312                                 | 2.447.564                     | y                    | iron                           | FeoB1                          |          |
| MSR1L_02660                                            | ?                          | MGMSRV2_2313                                 | 2.447.834                     | y                    | iron                           | FeoA1                          |          |
| <b>MSR1L_03790</b>                                     | 362.043                    | <b>MGMSRV2_2333</b>                          | ?                             | y                    |                                | <b>transposase</b>             |          |
| <b>MSR1L_03720</b>                                     | 356.696                    | <b>MGMSRV2_2342</b>                          | ?                             | y                    |                                | <b>uncharacterized protein</b> |          |
| MSR1L_03490                                            | ?                          | MGMSRV2_2367                                 | 2.488.707                     | y                    |                                | MamS                           |          |
| MSR1L_03490                                            | ?                          | MGMSRV2_2367                                 | ?                             | y                    |                                | MamS                           |          |
| MSR1L_03470                                            | ?                          | MGMSRV2_2368                                 | 2.489.180                     | y                    |                                | MamB                           |          |
| MSR1L_03450                                            | ?                          | MGMSRV2_2370                                 | 2.490.062                     | y                    |                                | MamQ                           |          |
| MSR1L_03450                                            | ?                          | MGMSRV2_2370                                 | 2.490.322                     | y                    |                                | MamQ                           |          |
| MSR1L_03440                                            | ?                          | MGMSRV2_2371                                 | 2.491.288                     | y                    |                                | MamA                           |          |
| MSR1L_03440                                            | ?                          | MGMSRV2_2371                                 | 2.491.553                     | y                    |                                | MamA                           |          |
| MSR1L_03430                                            | ?                          | MGMSRV2_2372                                 | 2.491.798                     | y                    | magnetochrome                  | MamP                           |          |
| MSR1L_03420                                            | ?                          | MGMSRV2_2373                                 | 2.492.513                     | y                    |                                | MamO                           |          |
| MSR1L_03420                                            | ?                          | MGMSRV2_2373                                 | 2.492.691                     | y                    |                                | MamO                           |          |
| MSR1L_03420                                            | ?                          | MGMSRV2_2373                                 | 2.492.725                     | y                    |                                | MamO                           |          |
| MSR1L_03420                                            | ?                          | MGMSRV2_2373                                 | 2.493.657                     | y                    |                                | MamO                           |          |
| MSR1L_03420                                            | ?                          | MGMSRV2_2373                                 | 2.493.676                     | y                    |                                | MamO                           |          |
| MSR1L_03420                                            | ?                          | MGMSRV2_2373                                 | 2.494.252                     | y                    |                                | MamO                           |          |
| MSR1L_03410                                            | ?                          | MGMSRV2_2374                                 | 2.494.949                     | y                    |                                | MamN                           |          |
| MSR1L_03410                                            | ?                          | MGMSRV2_2374                                 | 2.495.482                     | y                    |                                | MamN                           |          |
| MSR1L_03410                                            | ?                          | MGMSRV2_2374                                 | 2.495.507                     | y                    |                                | MamN                           |          |
| MSR1L_03400                                            | ?                          | MGMSRV2_2375                                 | 2.495.711                     | y                    |                                | MamM                           |          |
| MSR1L_03400                                            | ?                          | MGMSRV2_2375                                 | 2.496.524                     | y                    |                                | MamM                           |          |
| MSR1L_03400                                            | ?                          | MGMSRV2_2375                                 | 2.496.588                     | y                    |                                | MamM                           |          |
| MSR1L_03390                                            | 327.647                    | MGMSRV2_2376                                 | 2.496.966                     | y                    |                                | MamL                           |          |
| MSR1L_03380                                            | 327.528                    | MGMSRV2_2377                                 | ?                             | y                    |                                | MamK                           |          |
| MSR1L_03380                                            | ?                          | MGMSRV2_2378                                 | 2.498.200                     | y                    |                                | MamJ                           |          |
| MSR1L_03380                                            | ?                          | MGMSRV2_2378                                 | 2.498.495                     | y                    |                                | MamJ                           |          |
| MSR1L_03380                                            | ?                          | MGMSRV2_2378                                 | 2.498.950                     | y                    |                                | MamJ                           |          |
| MSR1L_03360                                            | ?                          | MGMSRV2_2379                                 | 2.500.164                     | y                    | magnetochrome                  | MamE                           |          |
| MSR1L_03360                                            | ?                          | MGMSRV2_2379                                 | 2.500.909                     | y                    | magnetochrome                  | MamE                           |          |
| MSR1L_03360                                            | ?                          | MGMSRV2_2379                                 | 2.501.121                     | y                    | magnetochrome                  | MamE                           |          |
| MSR1L_03360                                            | ?                          | MGMSRV2_2379                                 | 2.501.231                     | y                    | magnetochrome                  | MamE                           |          |
| MSR1L_03360                                            | ?                          | MGMSRV2_2379                                 | 2.501.283                     | y                    | magnetochrome                  | MamE                           |          |
| MSR1L_03360                                            | ?                          | MGMSRV2_2379                                 | 2.501.362                     | y                    | magnetochrome                  | MamE                           |          |
| MSR1L_03360                                            | ?                          | MGMSRV2_2379                                 | 2.501.601                     | y                    | magnetochrome                  | MamE                           |          |
| MSR1L_03360                                            | ?                          | MGMSRV2_2379                                 | 2.501.700                     | y                    | magnetochrome                  | MamE                           |          |



|             |         |              |           |   |  |      |  |
|-------------|---------|--------------|-----------|---|--|------|--|
| MSR1L_03350 | ?       | MGMSRV2_2380 | 2.501.812 | y |  | MamI |  |
| MSR1L_03350 | ?       | MGMSRV2_2380 | 2.501.906 | y |  | MamI |  |
| MSR1L_03340 | ?       | MGMSRV2_2381 | 2.502.087 | y |  | MamH |  |
| MSR1L_03340 | ?       | MGMSRV2_2381 | 2.502.815 | y |  | MamH |  |
| MSR1L_03340 | ?       | MGMSRV2_2381 | 2.503.101 | y |  | MamH |  |
| MSR1L_03180 | 308.340 | MGMSRV2_2396 | 2.515.320 | y |  | Mms6 |  |
