# Supplementary material for: Genome-Wide Identification of Essential and Auxiliary Gene Sets for Magnetosome Biosynthesis in Magnetospirillum gryphiswaldense
Source: PubMed Central journal article supplement (PMC7676999; doi:10.1128/msystems.00565-20), 2020-11-17
Supplement: mSystems.00565-20-st003.pdf [file mSystems.00565-20-st003.pdf]

**Table S3. exMAI N/Wmag genes associated with overrepresented GO-terms identified by FET-analysis against the genomic background**

|    | MGMSRv2_ | MSR1L_ | GO-terms                                                                                                                                                                                                                                                                           | Magnetic phenotype of Tn5 insertion alleles<br>(nc: not-characterized beyond colony color) |
|----|----------|--------|------------------------------------------------------------------------------------------------------------------------------------------------------------------------------------------------------------------------------------------------------------------------------------|--------------------------------------------------------------------------------------------|
| 1  | 1252     | 10050  | 4-coumarate-CoA ligase activity                                                                                                                                                                                                                                                    | Wmag                                                                                       |
| 2  | 1722     | 5930   | calcium ion binding                                                                                                                                                                                                                                                                | Wmag                                                                                       |
| 3  | 266      | 19360  | calcium ion binding-external encapsulating structure                                                                                                                                                                                                                               | Wmag+nc                                                                                    |
| 4  | 1279     | 9800   | dimethylallyltranstransferase activity-geranyltranstransferase activity                                                                                                                                                                                                            | Wmag                                                                                       |
| 5  | 1417     | 8250   | external encapsulating structure                                                                                                                                                                                                                                                   | Wmag                                                                                       |
| 6  | 1082     | 11790  | guanosine tetraphosphate metabolic process-diphosphoric monoester hydrolase activity-GTP diphosphokinase activity-guanosine-3',5'-bis(diphosphate) 3'-diphosphatase activity-purine ribonucleoside bisphosphate metabolic process                                                  | Wmag+WTmag                                                                                 |
| 7  | 398      | 18150  | guanosine-5'-triphosphate,3'-diphosphate diphosphatase activity-exopolyphosphatase activity                                                                                                                                                                                        | Wmag                                                                                       |
| 8  | 3560     | 32700  | homocysteine biosynthetic process-homocysteine metabolic process                                                                                                                                                                                                                   | Wmag                                                                                       |
| 9  | 3966     | 24500  | hydroxyacylglutathione hydrolase activity                                                                                                                                                                                                                                          | Wmag                                                                                       |
| 10 | 2673     | 36930  | methylmalonyl-CoA mutase activity-tetrapyrrole binding-cobalamin binding                                                                                                                                                                                                           | Wmag                                                                                       |
| 11 | 3255     | 29810  | methylmalonyl-CoA mutase activity-tetrapyrrole binding-cobalamin binding                                                                                                                                                                                                           | Wmag                                                                                       |
| 12 | 2474     | 38410  | mismatch repair-mismatched DNA binding                                                                                                                                                                                                                                             | Wmag+nc                                                                                    |
| 13 | 450      | 17640  | oxidation-reduction process                                                                                                                                                                                                                                                        | Wmag                                                                                       |
| 14 | 1295     | 9720   | oxidation-reduction process                                                                                                                                                                                                                                                        | Wmag                                                                                       |
| 15 | 1555     | 14910  | oxidation-reduction process                                                                                                                                                                                                                                                        | Wmag                                                                                       |
| 16 | 2011     | 2270   | oxidation-reduction process                                                                                                                                                                                                                                                        | Wmag                                                                                       |
| 17 | 2273     | 22700  | oxidation-reduction process                                                                                                                                                                                                                                                        | 6Wmag+WTmag                                                                                |
| 18 | 2950     | 34190  | oxidation-reduction process                                                                                                                                                                                                                                                        | Wmag                                                                                       |
| 19 | 3942     | 24710  | oxidation-reduction process                                                                                                                                                                                                                                                        | Wmag                                                                                       |
| 20 | 853      | 14090  | oxidation-reduction process-alpha-1,4-glucan synthase activity-starch synthase activity-glycogen (starch) synthase activity-UDP-glucosyltransferase activity-glucosyltransferase activity                                                                                          | Wmag                                                                                       |
| 21 | 1617     | 15530  | oxidation-reduction process-glutaryl-CoA dehydrogenase activity                                                                                                                                                                                                                    | Wmag                                                                                       |
| 22 | 1403     | 8390   | oxidation-reduction process-oxidoreductase activity, acting on other nitrogenous compounds as donors, cytochrome as acceptor-tetrapyrrole binding-hydroxylamine reductase activity-nitrite reductase (NO-forming) activity                                                         | Wmag                                                                                       |
| 23 | 1716     | 5990   | oxidation-reduction process-oxidoreductase activity, acting on other nitrogenous compounds as donors, cytochrome as acceptor-tetrapyrrole binding-nitric oxide reductase activity                                                                                                  | 2 Wmag+nc                                                                                  |
| 24 | 469      | 17440  | oxidation-reduction process-phosphoadenylyl-sulfate reductase (thioredoxin) activity-sulfate assimilation, phosphoadenylyl sulfate reduction by phosphoadenylyl-sulfate reductase (thioredoxin)-oxidoreductase activity, acting on a sulfur group of donors, disulfide as acceptor | Wmag+WTmag+2nc                                                                             |
| 25 | 470      | 17430  | oxidation-reduction process-sulfate adenylyltransferase activity-sulfate adenylyltransferase (ATP) activity-sulfate reduction                                                                                                                                                      | Wmag+WTmag+2nc                                                                             |
| 26 | 134      | 450    | protein histidine kinase activity-phosphorelay sensor kinase activity- phosphotransferase activity, nitrogenous group as acceptor-protein kinase activity                                                                                                                          | Wmag                                                                                       |
| 27 | 1113     | 11550  | protein histidine kinase activity-phosphorelay sensor kinase activity- phosphotransferase activity, nitrogenous group as acceptor-protein kinase activity                                                                                                                          | Wmag+nc                                                                                    |
| 28 | 732      | 16320  | protein histidine kinase activity-phosphorelay sensor kinase activity- phosphotransferase activity, nitrogenous group as acceptor-protein kinase activity                                                                                                                          | Wmag                                                                                       |
| 29 | 1231     | 10260  | protein histidine kinase activity-phosphorelay sensor kinase activity- phosphotransferase activity, nitrogenous group as acceptor-protein kinase activity                                                                                                                          | Wmag+nc                                                                                    |
| 30 | 1777     | 5370   | protein histidine kinase activity-phosphorelay sensor kinase activity- phosphotransferase activity, nitrogenous group as acceptor-protein kinase activity                                                                                                                          | Wmag                                                                                       |
| 31 | 4151     | 38770  | protein histidine kinase activity-phosphorelay sensor kinase activity- phosphotransferase activity, nitrogenous group as acceptor-protein kinase activity                                                                                                                          | Wmag                                                                                       |
| 32 | 2976     | 33940  | secretion-secretion by cell-peptide secretion-protein secretion                                                                                                                                                                                                                    | Wmag                                                                                       |
| 33 | 3625     | 27560  | secretion-secretion by cell-peptide secretion-protein secretion                                                                                                                                                                                                                    | Wmag                                                                                       |
| 34 | 3736     | 26700  | sirohdrochlorin cobaltochelataase activity                                                                                                                                                                                                                                         | Wmag                                                                                       |
| 35 | 3376     | 30940  | UDP-glucuronate decarboxylase activity                                                                                                                                                                                                                                             | Wmag+5 WTmag+nc                                                                            |
| 36 | 2540     | 37510  | virion assembly                                                                                                                                                                                                                                                                    | Wmag                                                                                       |
