# Supplementary material for: Genome-Wide Identification of Essential and Auxiliary Gene Sets for Magnetosome Biosynthesis in Magnetospirillum gryphiswaldense
Source: PubMed Central journal article supplement (PMC7676999; doi:10.1128/msystems.00565-20), 2020-11-17
Supplement: mSystems.00565-20-st004.pdf [file mSystems.00565-20-st004.pdf]

**Table S4.** Characteristics of Mgryph deletion mutants\* in genes for which Tn5-insertion yielded a magnetosome phenotype

| Locus-tag<br>MSR1(L)_ | Locus-tag<br>MGMSRv2_ | Gene name                 | Magnetic phenotype ( $\Delta$ )<br>compared to WT                                                               | TEM ( $\Delta$ )                                                                     |
|-----------------------|-----------------------|---------------------------|-----------------------------------------------------------------------------------------------------------------|--------------------------------------------------------------------------------------|
| 29190                 | 3192                  | <i>ccmI (cycH)</i>        | less magnetosomes                                                                                               | 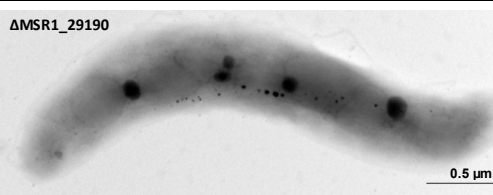  |
| 22700                 | 2273                  | <i>dsbA</i>               | shorter chains                                                                                                  |   |
| 17040                 | 511                   | <i>dsbB</i>               | smaller and less magnetosomes                                                                                   |   |
| 17450-17420           | 468-471               | <i>sir-cysH-cysD-cysC</i> | significantly increased number of defective crystals, higher prevalence of cells with double magnetosome chains |  |

\*grown microaerobically in flask standard medium (FSM, U. Heyen and D. Schüler, Appl Microbiol Biotechnol 61, 2003, doi: 10.1007/s00253-002-1219-x)
